# Supplementary material for: Phage-assisted evolution of highly active cytosine base editors with enhanced selectivity and minimal sequence context preference
Source: PubMed Central journal article supplement (PMC10894238; doi:10.1038/s41467-024-45969-7), 2024-02-24
Supplement: 41467_2024_45969_MOESM1_ESM.pdf [file 41467_2024_45969_MOESM1_ESM.pdf]

## **Supplementary Information**

### **Phage-assisted evolution of highly active cytosine base editors with enhanced selectivity and minimal sequence context preference**

Emily Zhang<sup>1,2,3</sup>, Monica E. Neugebauer<sup>1,2,3</sup>, Nicholas A. Krasnow<sup>1,2,3</sup>, and David R. Liu<sup>1,2,3\*</sup>

<sup>1</sup>Merkin Institute of Transformative Technologies in Healthcare, Broad Institute of MIT and Harvard, Cambridge, Massachusetts, USA

<sup>2</sup>Department of Chemistry and Chemical Biology, Harvard University, Cambridge, Massachusetts, USA

<sup>3</sup>Howard Hughes Medical Institute, Harvard University, Cambridge, Massachusetts, USA

\* To whom correspondence should be addressed: [drliu@fas.harvard.edu](mailto:drliu@fas.harvard.edu)

## Supplementary Figures

1. Evolved genotypes from PANCE and PACE.
2. Comparison of TadDE N46I and TadDE N46T variants from PANCE.
3. Energy calculation for TadA\* stability with and without Y73P.
4. *E. coli* profiling of TadDE-evolved CBEs at every 5' and 3' sequence context at position 6 in the protospacer (RBS=SD8).
5. *E. coli* profiling of TadDE-evolved CBEs at every 5' and 3' sequence context at position 6 in the protospacer (RBS=sd5).
6. Sequence context motifs for a target cytidine at every 5' and 3' sequence context at positions 1-14 in the protospacer.
7. Sequence context motifs for a target adenine at every 5' and 3' sequence context at positions 1-14 in the protospacer.
8. *E. coli* profiling of TadDE-evolved CBEs for cytidine deamination at every 5' and 3' sequence context at positions 1-10 in the protospacer.
9. *E. coli* profiling of TadDE-evolved CBEs for adenine deamination at every 5' and 3' sequence context at positions 1-10 in the protospacer.
10. Reversion analysis of TadDE-evolved CBE variants.
11. Addition of mutations to TadCBE<sub>d</sub>.
12. Full comparison of base editors at four SpCas9 target sites.
13. Full comparison of base editors at four eNme2-C Cas9 target sites.
14. Indels by SpCas9 variants at four SpCas9 target sites.
15. Indels by eNme2-C Cas9 variants at four eNme2-C Cas9 target sites.
16. On-target and Cas-dependent editing of known off-target sites for *HEK3*.
17. On-target and Cas-dependent editing of known off-target sites for *HEK4*.
18. On-target and Cas-dependent editing of known off-target sites for *EMX1*.
19. On-target and Cas-dependent editing of known off-target sites for *BCL11a*.
20. On-target editing at *EMX1* correlated to Cas-independent off-target editing.
21. Cas-independent off-target editing at six genomic SaCas9 R-loops.
22. On-target editing at *EMX1* correlated to RNA off-target editing.
23. Comparison of peak editing of base editors at four SpCas9 target sites with statistical significance.
24. Comparison of peak editing of base editors at four eNme2C-Cas9 target sites with statistical significance.

25. Peak editing of base editors at 3 *PCSK9* target sites with statistical significance.
26. Cas-independent off-target editing at six genomic SaCas9 R-loops with statistical significance.
27. Cas-dependent off-target editing of peak editing of known off-target sites for *HEK3* with statistical significance.
28. Cas-dependent off-target editing of peak editing of known off-target sites for *HEK4* with statistical significance.
29. Cas-dependent off-target editing of peak editing of known off-target sites for *EMX1* with statistical significance.
30. Cas-dependent off-target editing of peak editing of known off-target sites for *BCL11a* with statistical significance.
31. RNA off-target editing with statistical significance.

### **Supplementary Tables**

1. Selectivity of TadDE-evolved CBEs calculated from *E. coli* profiling library (SD8, position 6)
2. Selectivity of TadDE-evolved CBEs calculated from *E. coli* profiling library (sd2, positions 4-8)
3. Plasmids and selection phage (SP) used in this work.
4. Promoter and RBS sequences for plasmids and phage used in evolution.
5. cDNA amplicon sequences and primers for RNA off-target analysis.
6. Primers for generating base editor amplicons for IVT.
7. Chemically synthesized guide RNAs used for fibroblast experiments.

### **Supplementary Notes**

1. Evolved deaminase amino acid sequences.
2. Sequences of Cas9 domains.

**a**

| TadA-8e | R26 | V28 | N46 | A48 | Q71 | Y73 | H96 | Q154 |
|---------|-----|-----|-----|-----|-----|-----|-----|------|
| TadDE   | G   | A   |     | R   |     | S   | N   | H    |
| L1-1    | G   | A   | I   | R   |     | P   | N   |      |
| L1-2    | G   | A   | I   | R   |     | P   | N   |      |
| L1-3    | G   | A   | T   | R   |     | S   | N   | H    |
| L1-4    | G   | A   |     | R   |     | S   | N   | H    |
| L2-1    | G   | A   | I   | R   |     | S   | N   |      |
| L2-2    | G   | A   | T   | R   |     | S   | N   |      |
| L2-3    | G   | A   |     | R   | S   | S   | N   |      |

**b**

| TadA-8e | R26 | V28 | N46 | A48 | Y73 | T79 | H96 | G105 |
|---------|-----|-----|-----|-----|-----|-----|-----|------|
| TadDE   | G   | A   |     | R   | S   |     | N   |      |
| L1-1    | G   | A   | L   | R   | P   |     | N   |      |
| L1-2    | G   | A   | L   | R   | P   |     | N   |      |
| L1-3    | G   | A   |     |     | P   |     | N   |      |
| L1-4    | G   | A   | V   | R   | S   |     | N   |      |
| L2-1    | G   | A   | V   | R   | P   |     | N   |      |
| L2-2    | G   |     | L   |     |     |     |     |      |
| L2-3    | G   | A   | I   | R   | P   |     | N   |      |
| L2-4    | G   | A   | V   | R   | P   |     | N   | S    |
| L3-1    | G   | A   |     | P   | H   | P   | N   |      |
| L3-2    | G   |     | I   |     |     |     | N   |      |

**c**

| TadA-8e | R26 | V28 | N46 | A48 | Q71 | Y73 | H96 | A162 |
|---------|-----|-----|-----|-----|-----|-----|-----|------|
| TadDE   | G   | A   |     | R   |     | S   | N   |      |
| 72 h    | G   | A   | V   | R   |     | P   | N   |      |
| 72 h    | G   | A   | C   | R   |     | P   | N   | V    |
| 72 h    | G   | A   | L   | R   |     | S   | N   |      |
| 72 h    | G   | A   | V   | R   |     | P   | N   |      |
| 94 h    | G   | A   | C   | R   |     | P   | N   | V    |
| 94 h    | G   | A   | C   | R   |     | P   | N   | V    |
| 94 h    | G   | A   | C   | R   |     |     | N   | V    |
| 94 h    | G   | A   | V   | R   | H   | P   | N   |      |
| 118 h   | G   | A   | C   | R   |     | P   | N   |      |
| 118 h   | G   | A   | C   | R   |     | P   | N   |      |
| 118 h   | G   | A   | C   | R   |     | P   | N   |      |
| 118 h   | G   | A   | C   | R   |     | P   | N   | V    |
| 118 h   | G   | A   | C   | R   |     | P   | N   |      |

**d**

| TadA-8e | R26 | V28 | L34 | N46 | A48 | R64 | Y73 | H96 |
|---------|-----|-----|-----|-----|-----|-----|-----|-----|
| TadDE   | G   | A   |     |     | R   |     | S   | N   |
| 72 h    | G   | A   |     | V   | R   |     | P   | N   |
| 72 h    | G   | A   | M   | L   | R   |     | P   | N   |
| 72 h    | G   | A   |     | C   | R   |     | P   | N   |
| 72 h    | G   | A   |     | V   | R   |     | S   | N   |
| 94 h    | G   | A   |     | V   | P   |     | S   | N   |
| 94 h    | G   | A   |     | L   | R   |     | P   | N   |
| 94 h    | G   | A   |     | L   | P   | K   | P   | N   |

**Supplementary Figure 1. Evolved genotypes from PANCE and PACE. (a)** Genotypes from PANCE lagoons (L1–L2) after 6 passages of PANCE. **(b)** Genotypes from PANCE lagoons (L1–L3) after 5 passages of PANCE using an NNK library at position N46. **(c)** Genotypes from PACE lagoon (L1) after PANCE using an NNK library at position N46. Phage were sequenced at the time points as indicated in the table. **(d)** Genotypes at various timepoints from PACE lagoon (L2) after PANCE using an NNK library at position N46.



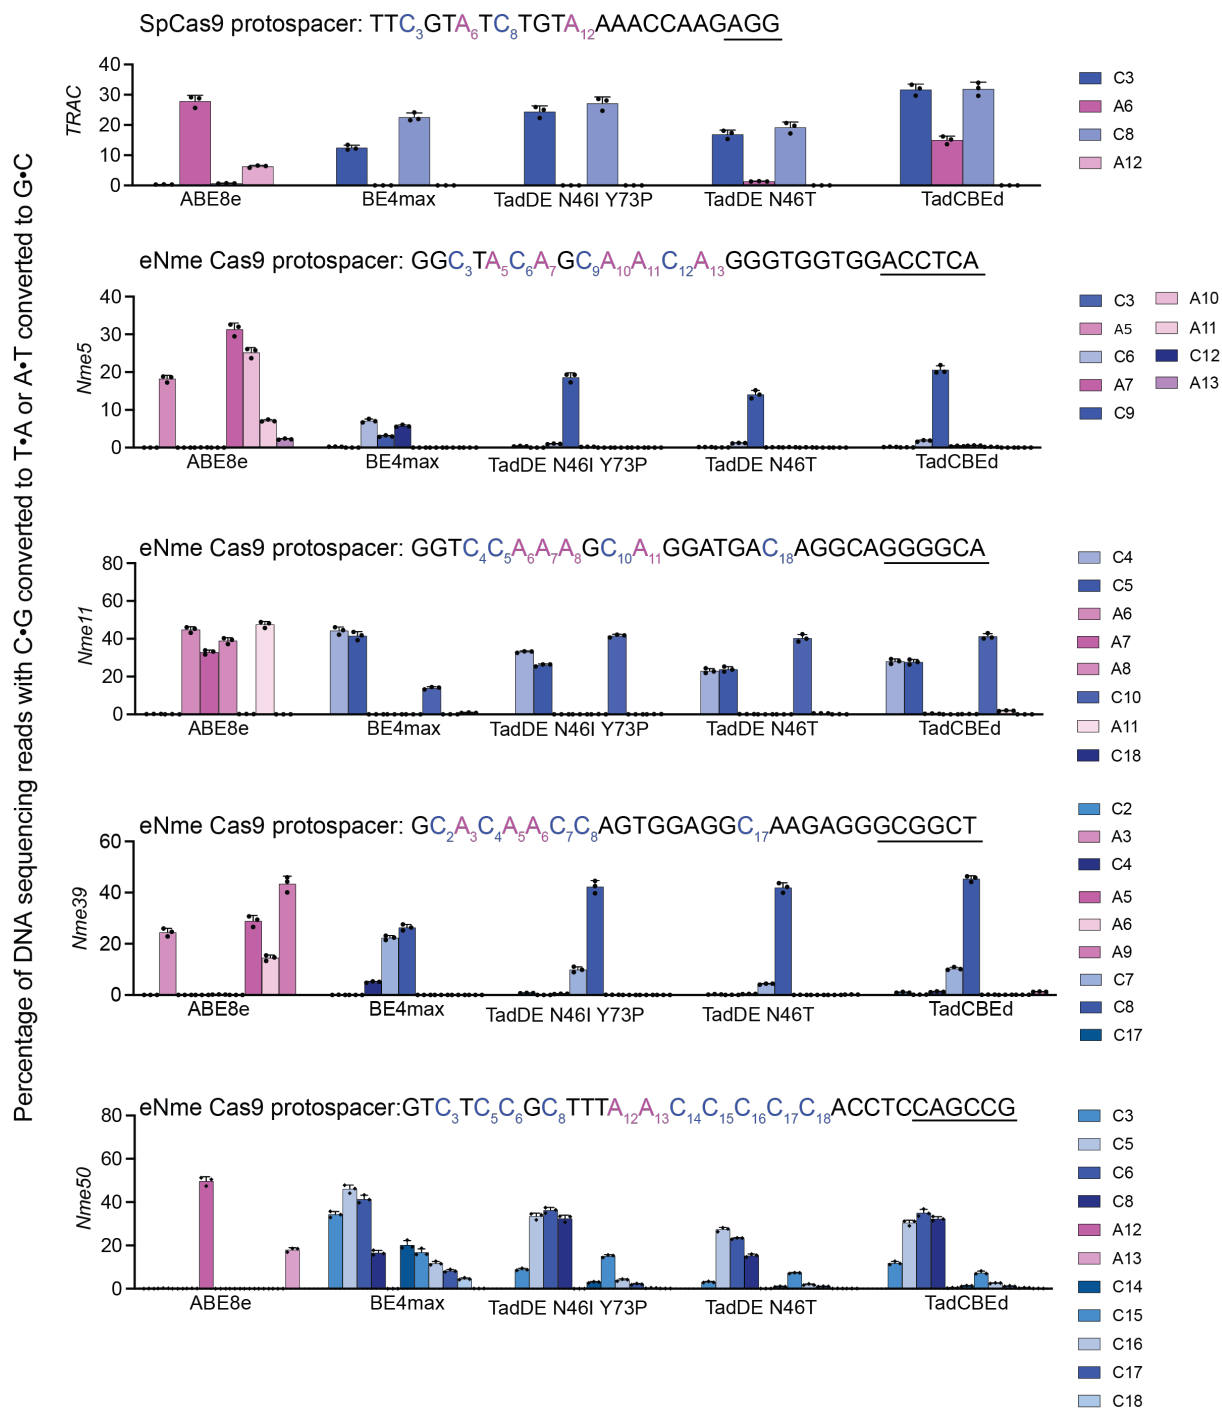

**Supplementary Figure 2. Comparison of TadDE N46I and TadDE N46T variants from PANCE.** The specified base editors using SpCas9 or eNmeC-Cas9 nickase domains in the BE4max architecture were transfected into HEK293T cells with a guide RNA targeting one of five genomic loci as shown in each graph. The mutations in the newly evolved variants are listed relative to TadDE. Target cytosines are blue, target adenines are magenta, and PAM sequences are underlined. C•G-to-T•A base editing is shown in shades of blue, and A•T-to-G•C base editing is shown in magenta. Dots represent individual values and bar values represent mean $\pm$ s.d. of n=3 independent biological replicates. Source data are provided as a Source Data file.

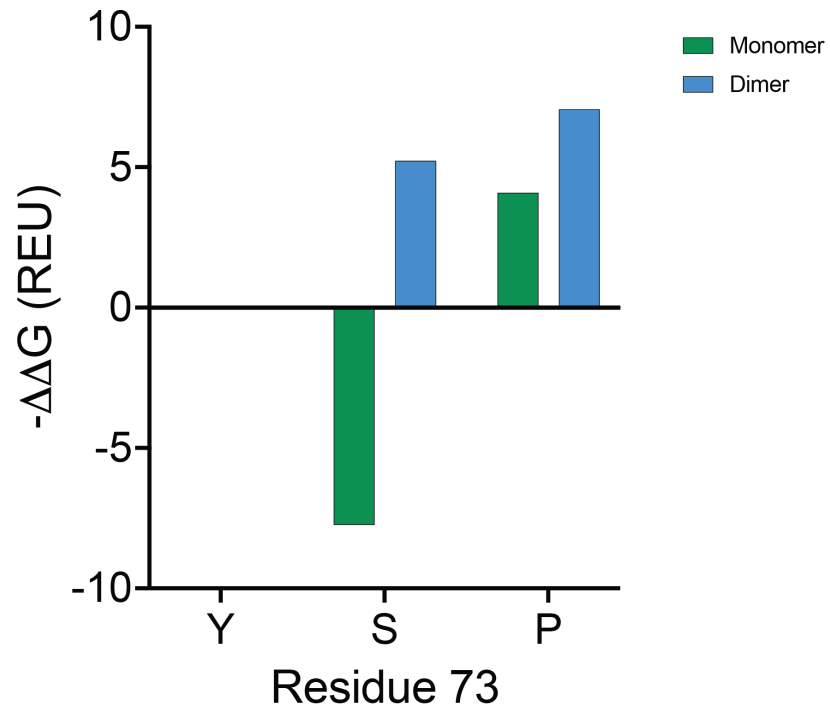

**Supplementary Figure 3. Energy calculation for TadA\* stability with and without Y73P.** Rosetta was used to calculate the energy of the TadA\* monomer and dimer with and without Y73P.  $\Delta\Delta G$  represents predicts how a single point mutation is predicted to affect stability. Source data are provided as a Source Data file.

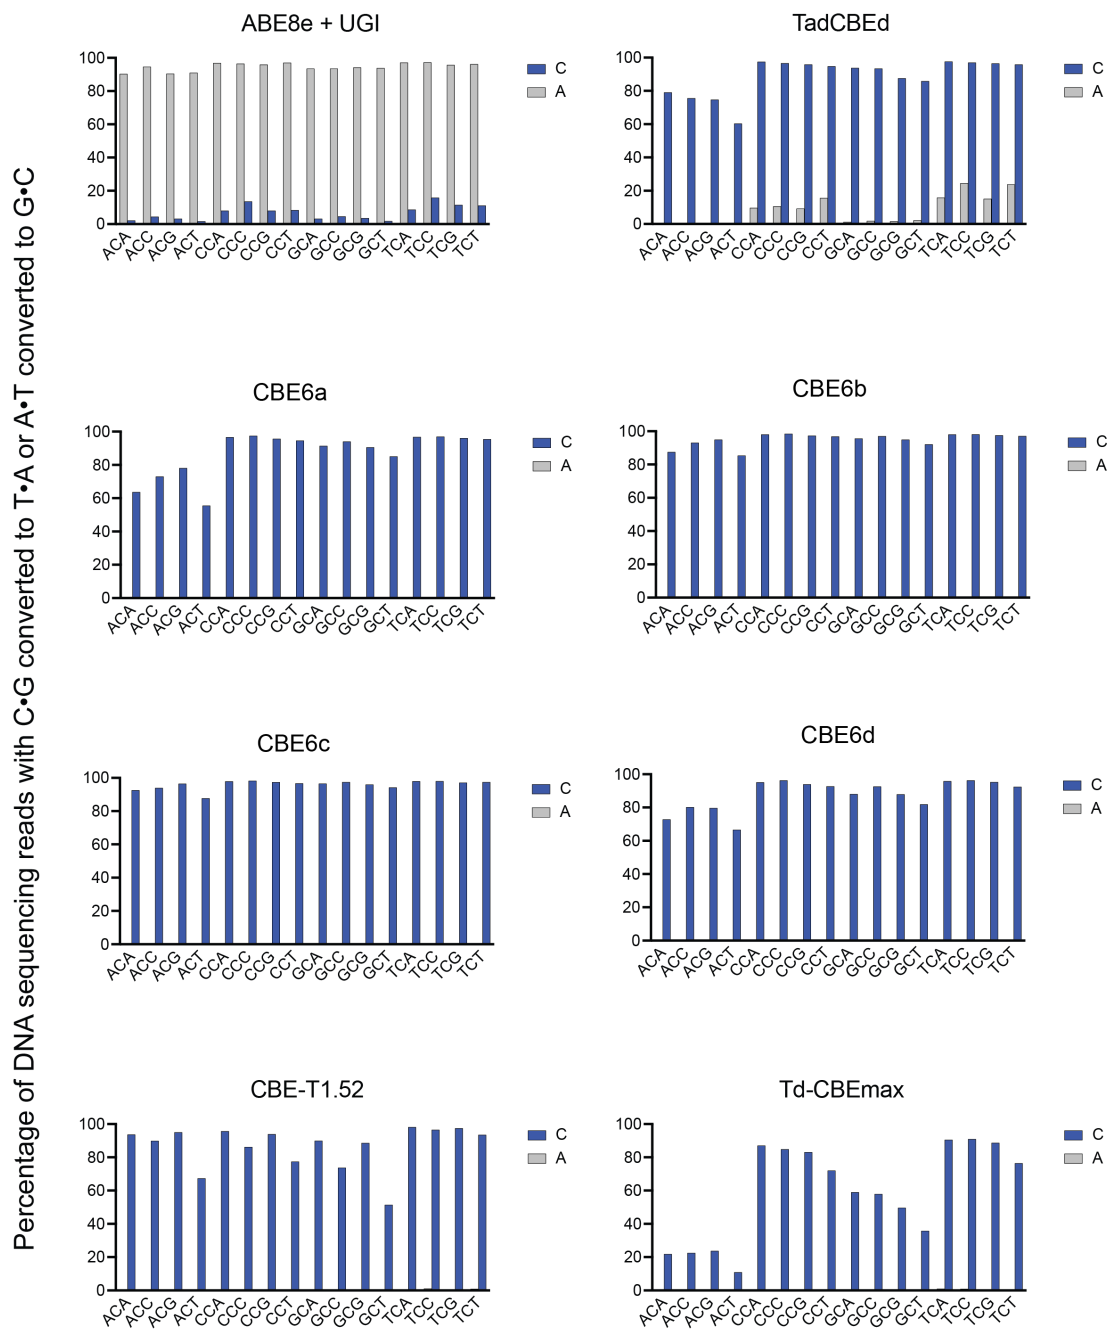

**Supplementary Figure 4. *E. coli* profiling of TadDE-evolved CBEs at every 5' and 3' sequence context at position 6 in the protospacer (RBS=SD8).** *E. coli* 10-Beta cells were transformed with specified base editors using dSpCas9 domains in the BE4max architecture or ABE8e and made competent for electroporation. A 32-member library with the target base at position 6 of the protospacer was electroporated into the *E. coli*. Each library member contains a matched protospacer and guide pair. Base editor expression was induced by addition of arabinose (RBS=SD8), and cells were grown overnight at 37 °C. Cells were harvested, and the target plasmid was analyzed by HTS. C•G-to-T•A base editing is shown in blue, and A•T-to-G•C editing is shown in grey. Each bar value is correlated to one of the dots presented in Figure 2b. Source data are provided as a Source Data file.

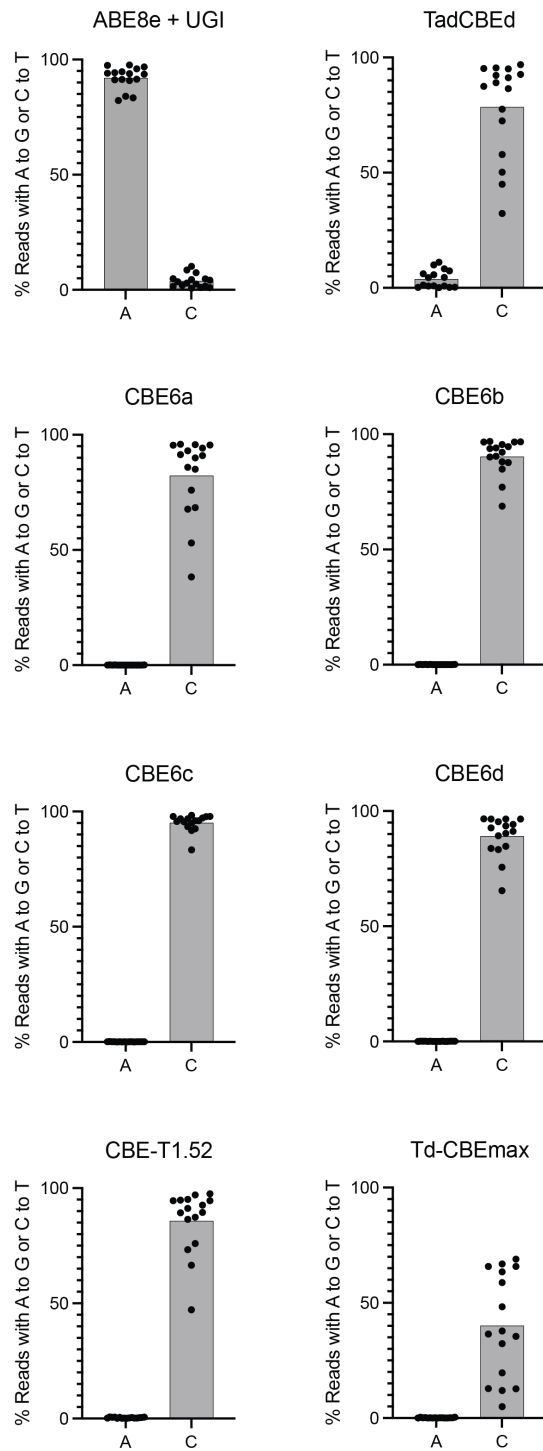

**Supplementary Figure 5. *E. coli* profiling of TadDE-evolved CBEs at every 5' and 3' sequence context at position 6 in the protospacer (RBS=sd5).** Base editing in *E. coli* using the 32-member library at position 6 of the protospacer (RBS=sd5). C•G-to-T•A edits and A•T-to-G•C edits are shown separately as bars. Dots represent the mean of n=3 independent biological replicates for each 5' and 3' sequence context. Source data are provided as a Source Data file.

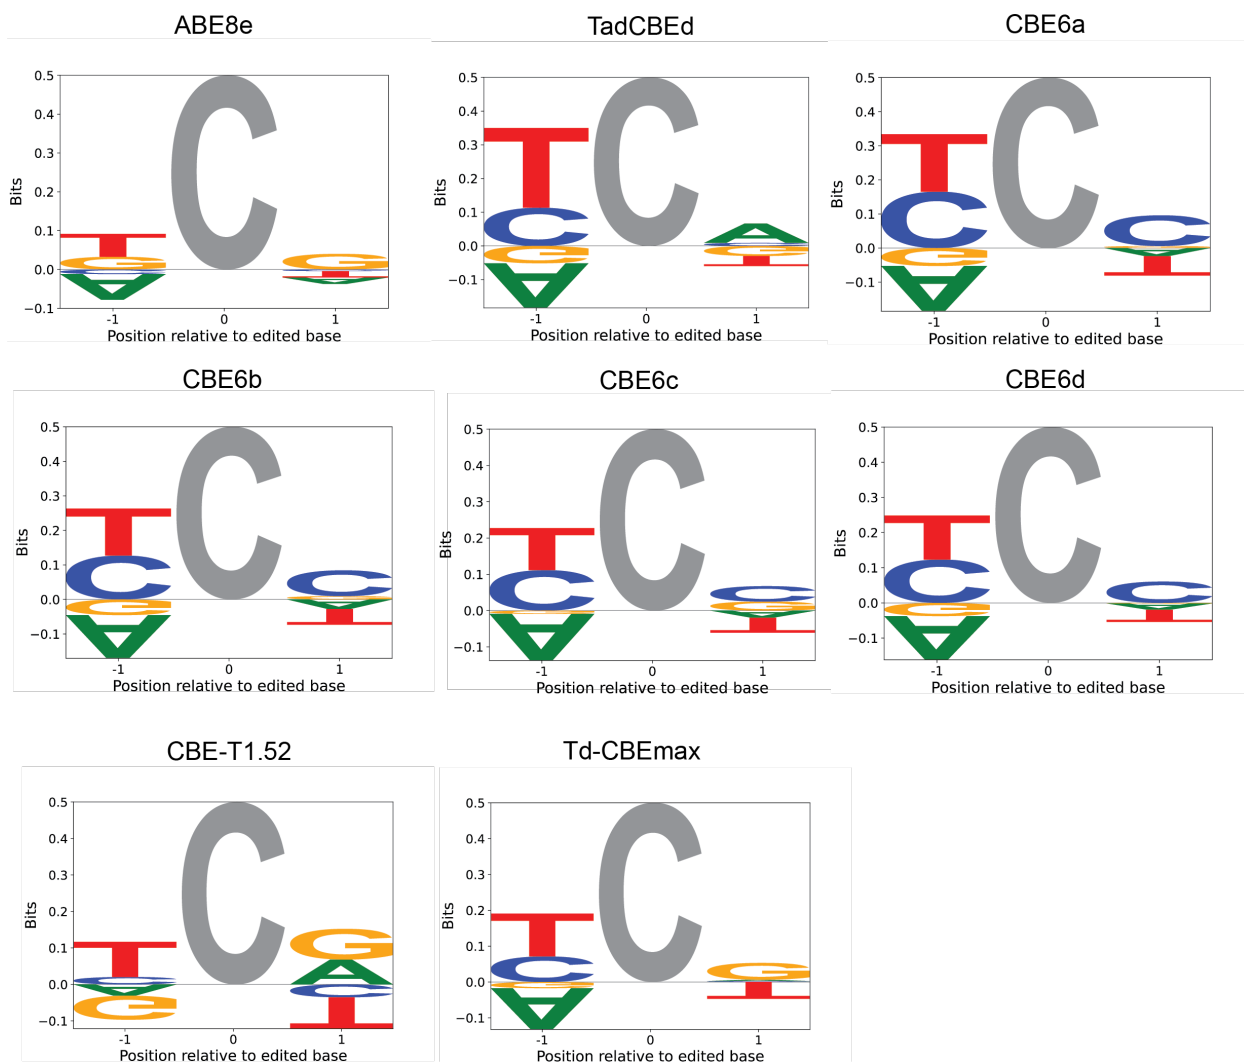

**Supplementary Figure 6. Sequence context motifs for a target cytidine at every 5' and 3' sequence context at positions 1-14 in the protospacer.** Sequence motifs (pos. 1-14) of CBE variants and ABE8e (RBS=sd2) when tested on a library of substrates designed to contain the target base (C) at protospacer positions 1-14 flanked by variable nucleotides (n=2 independent biological replicates). Source data are provided as a Source Data file.

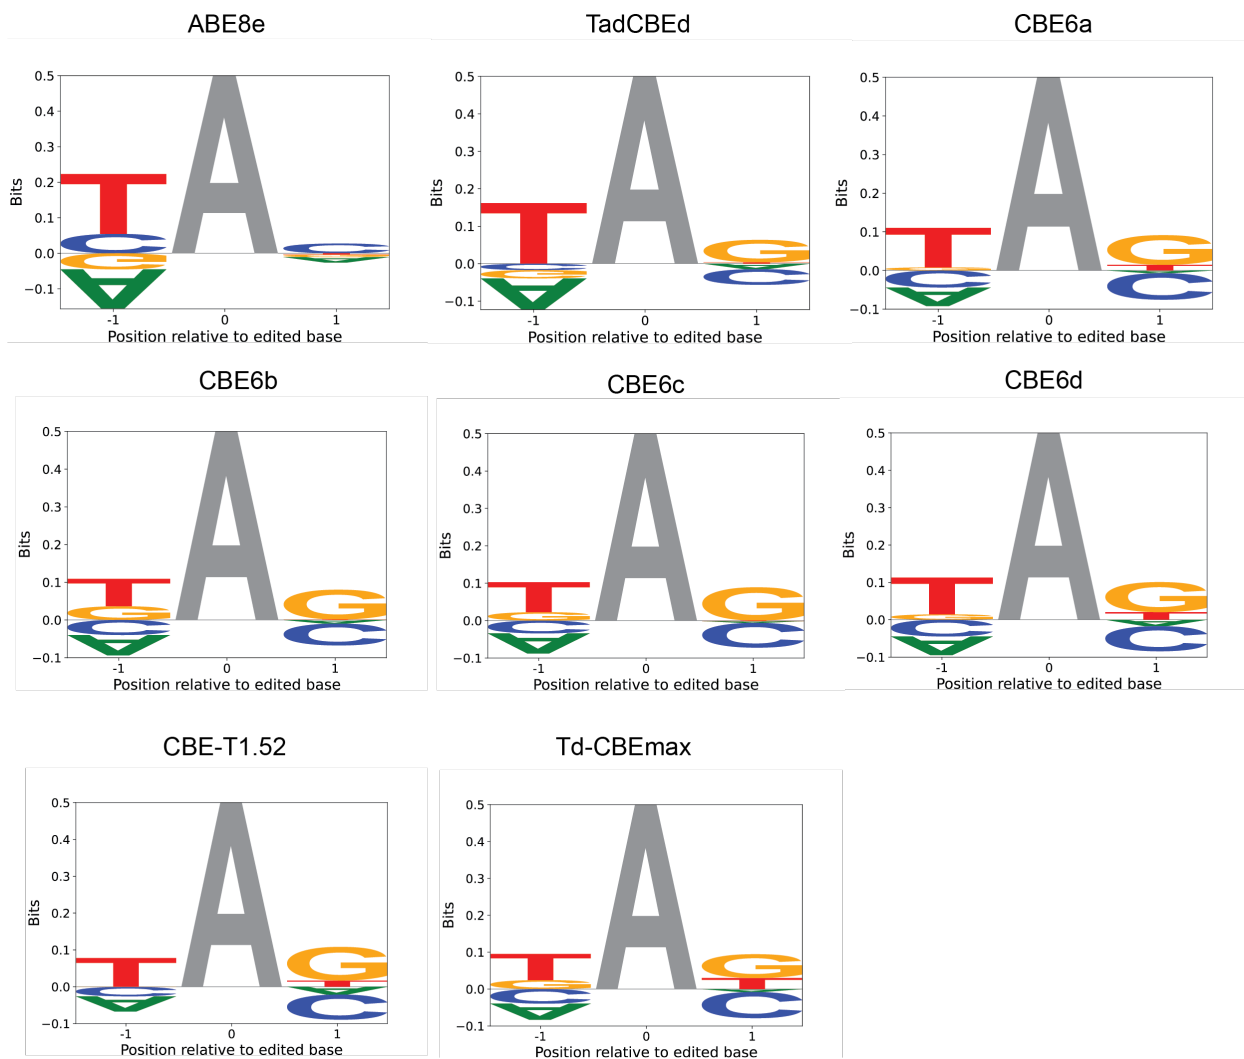

**Supplementary Figure 7. Sequence context motifs for a target adenine at every 5' and 3' sequence context at positions 1-14 in the protospacer.** Sequence motifs (pos. 1-14) of CBE variants and ABE8e (RBS=sd2) when tested on a library of substrates designed to contain the target base (A) at protospacer positions 1-14 flanked by variable nucleotides (n=2 independent biological replicates). Source data are provided as a Source Data file.

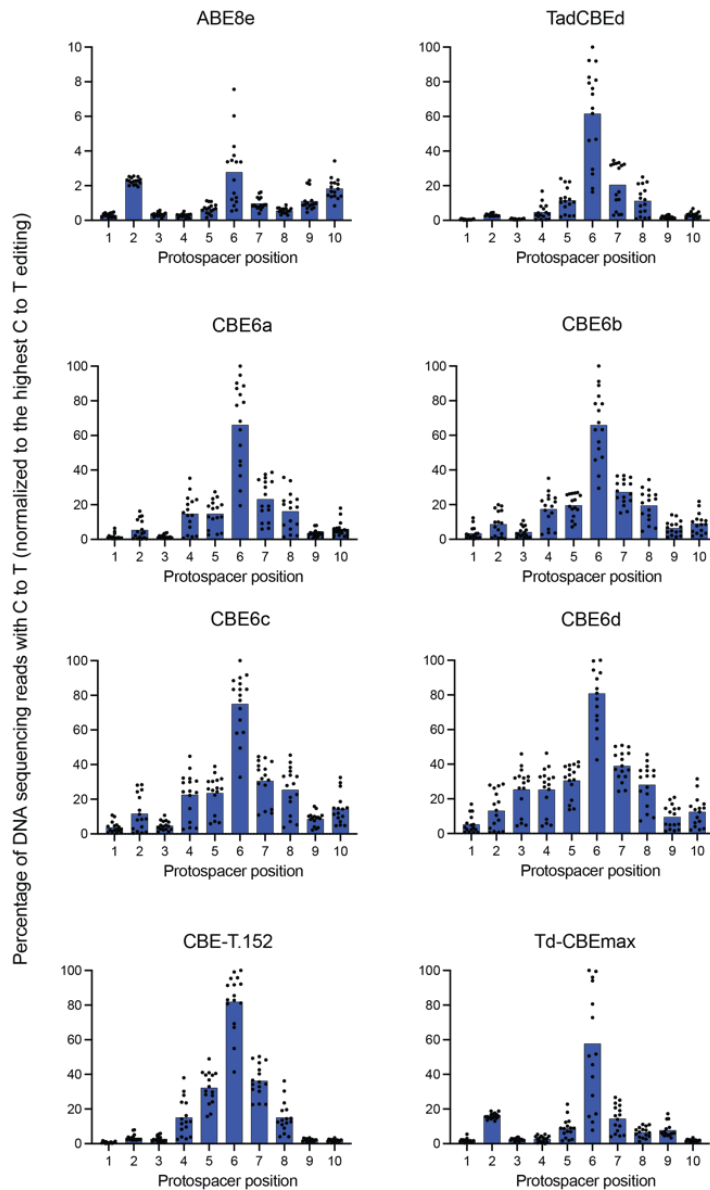

**Supplementary Figure 8. *E. coli* profiling of TadDE-evolved CBEs for cytidine deamination at every 5' and 3' sequence context at positions 1-10 in the protospacer.** *E. coli* 10-Beta cells were transformed with specified base editors using dSpCas9 domains in the BE4max architecture or ABE8e and made competent for electroporation. A 448-member library with the target base at positions ranging from 1-14 of the protospacer was electroporated into the *E. coli*. Each library member contains a matched protospacer and guide pair. Base editor expression was induced by addition of arabinose (RBS=sd2), and cells were grown overnight at 37 °C. Cells were harvested, and the target plasmid was analyzed by HTS. C•G-to-T•A base editing is shown in blue. Each dot represents the mean percentage of sequencing reads containing the specified edit for a given sequence context (n=2 independent biological replicates). Data were normalized to the highest C•G-to-T•A activity for CBE variants or A•T-to-G•C activity for ABE8e. Source data are provided as a Source Data file.

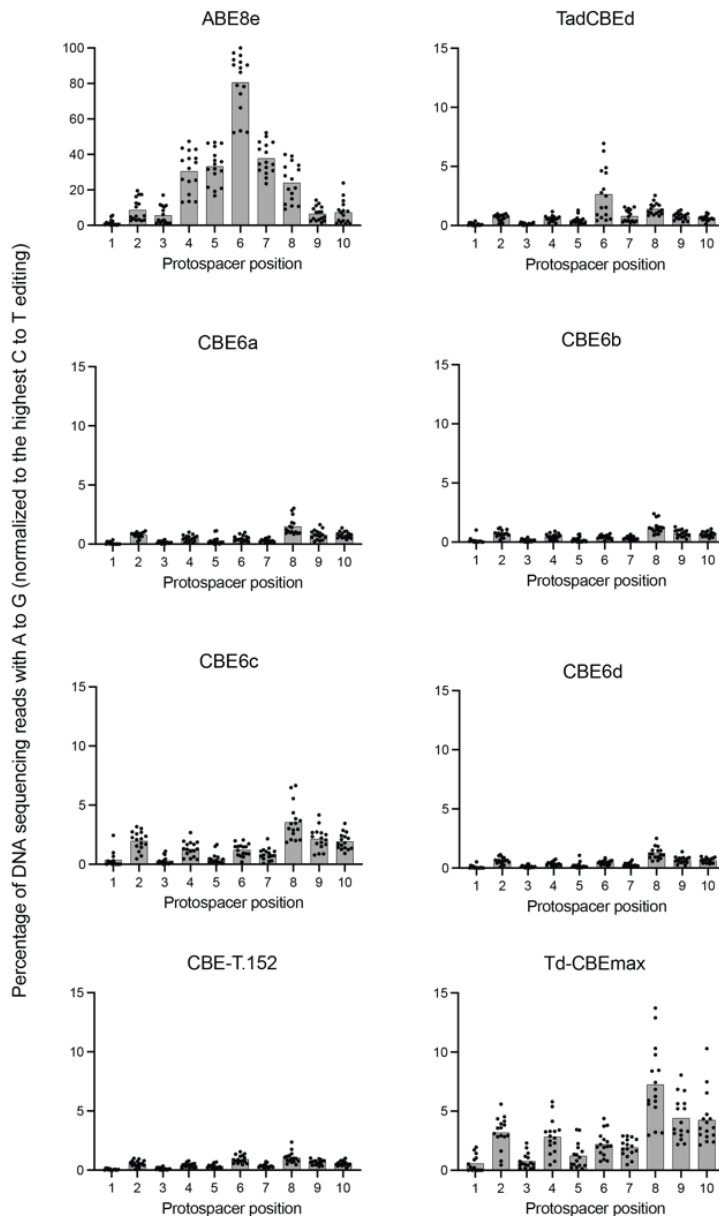

**Supplementary Figure 9. *E. coli* profiling of TadDE-evolved CBEs for adenine deamination at every 5' and 3' sequence context at positions 1-10 in the protospacer.** *E. coli* 10-Beta cells were transformed with specified base editors using dSpCas9 domains in the BE4max architecture or ABE8e and made competent for electroporation. A 448-member library with the target base at positions ranging from 1-14 of the protospacer was electroporated into the *E. coli*. Each library member contains a matched protospacer and guide pair. Base editor expression was induced by addition of arabinose (RBS=sd2), and cells were grown overnight at 37 °C. Cells were harvested, and the target plasmid was analyzed by HTS. A•T-to-G•C base editing is shown in gray. Each dot represents the mean percentage of sequencing reads containing the specified edit for a given sequence context (n=2 independent biological replicates). Data were normalized to the highest C•G-to-T•A activity for CBE variants or A•T-to-G•C activity for ABE8e. Source data are provided as a Source Data file.



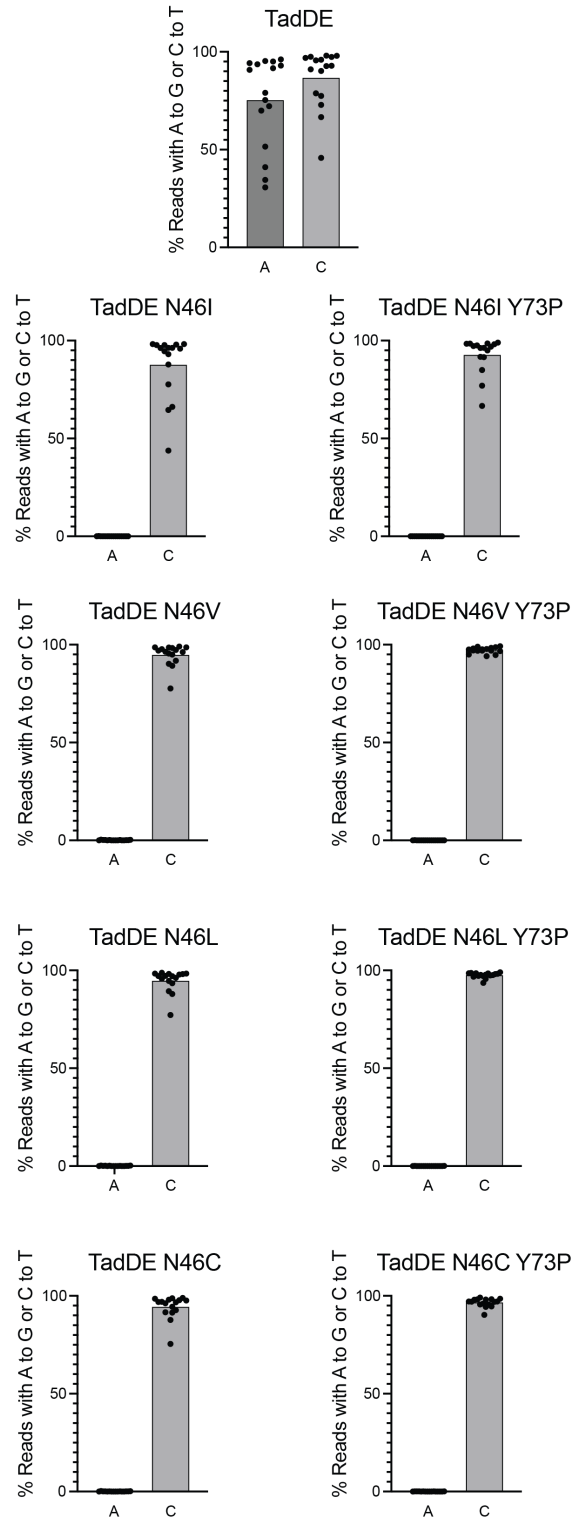

**Supplementary Figure 10. Reversion analysis of TadDE-evolved CBE variants.** Base editing in *E. coli* using the 32-member library at position 6 of the protospacer (RBS=SD8). Mutations shown are relative to TadDE. C•G-to-T•A edits and A•T-to-G•C edits are shown separately as bars. Dots represent the mean of n=3 independent biological replicates for each 5' and 3' sequence context. Source data are provided as a Source Data file.

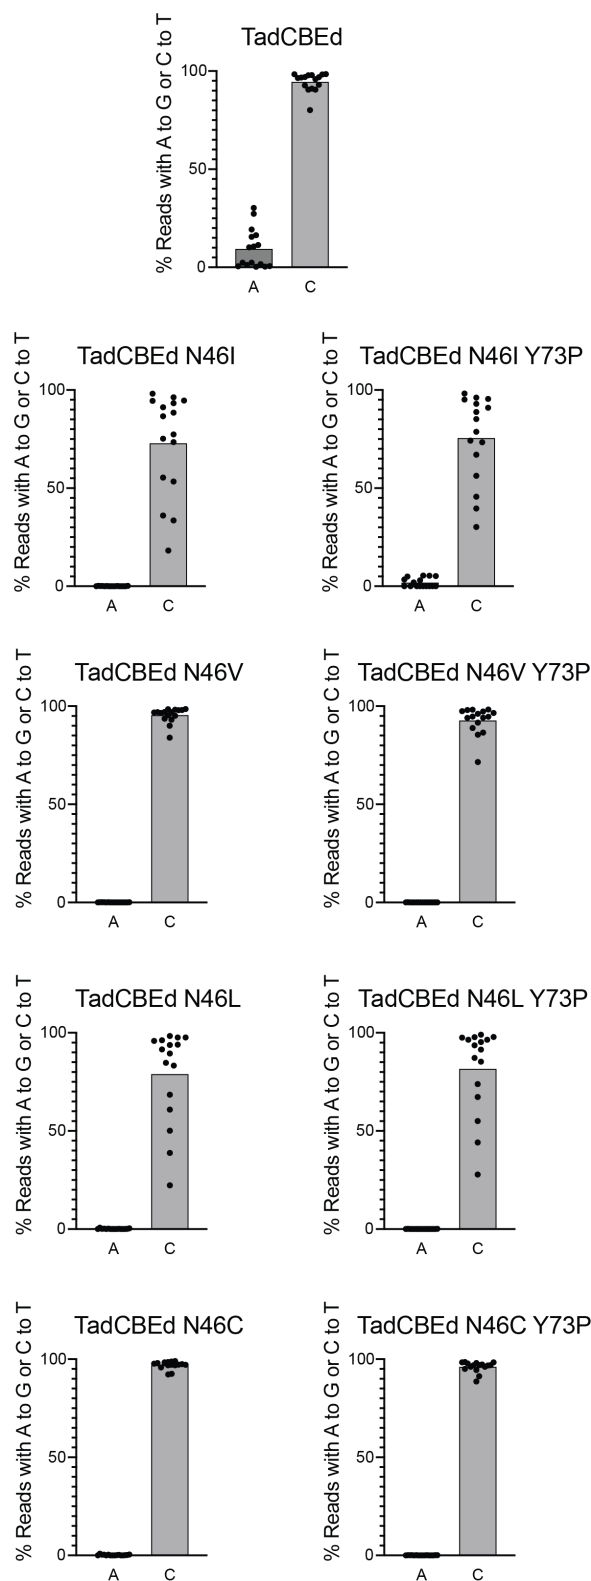

**Supplementary Figure 11. Addition of mutations to TadCBE.** Base editing in *E. coli* using the 32-member library at position 6 of the protospacer (RBS=SD8). Mutations shown are relative to TadCBE. C•G-to-T•A edits and A•T-to-G•C edits are shown separately as bars. Dots represent the mean of n=3 independent biological replicates for each 5' and 3' sequence context. Source data are provided as a Source Data file.

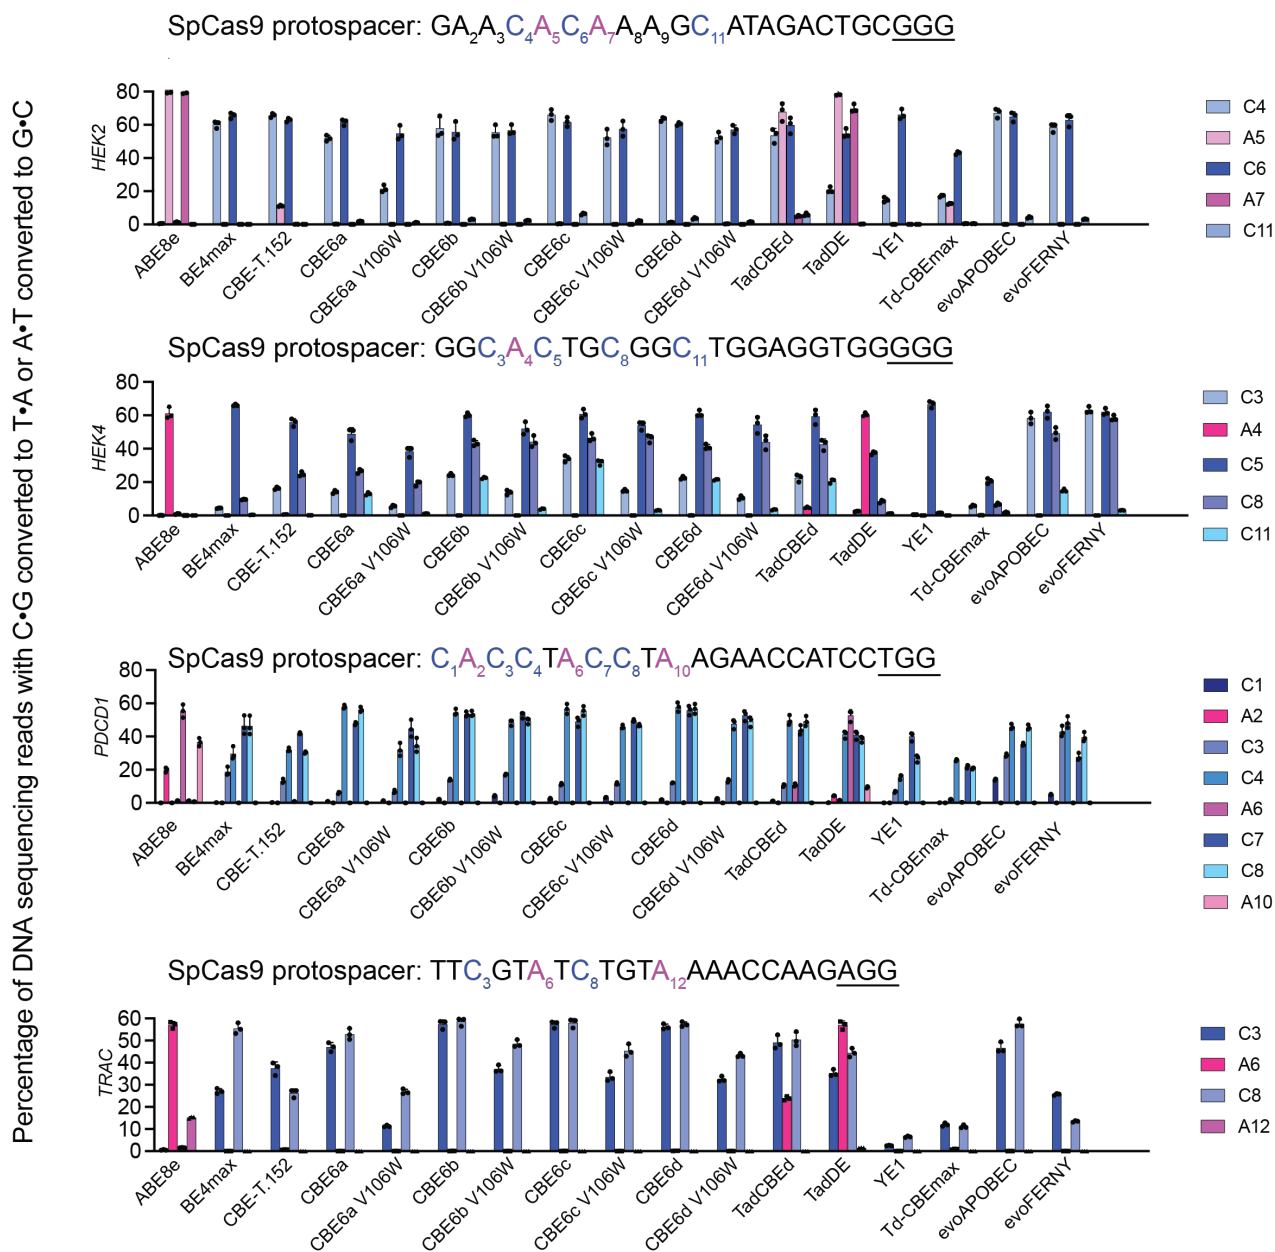

**Supplementary Figure 12. Full comparison of base editors at four SpCas9 target sites.** The specified base editors using SpCas9 nickase domains in the BE4max architecture were transfected into HEK293T cells with a guide RNA targeting one of four genomic loci as shown in each graph. HEK293T site 2 is abbreviated *HEK2*, and HEK293T site 4 is abbreviated *HEK4*. Target cytosines are blue, target adenines are magenta, and PAM sequences are underlined. C•G-to-T•A base editing is shown in shades of blue, and A•T-to-G•C base editing is shown in magenta. Dots represent individual values and bar values represent mean ± s.d. of n=3 independent biological replicates. Source data are provided as a Source Data file.

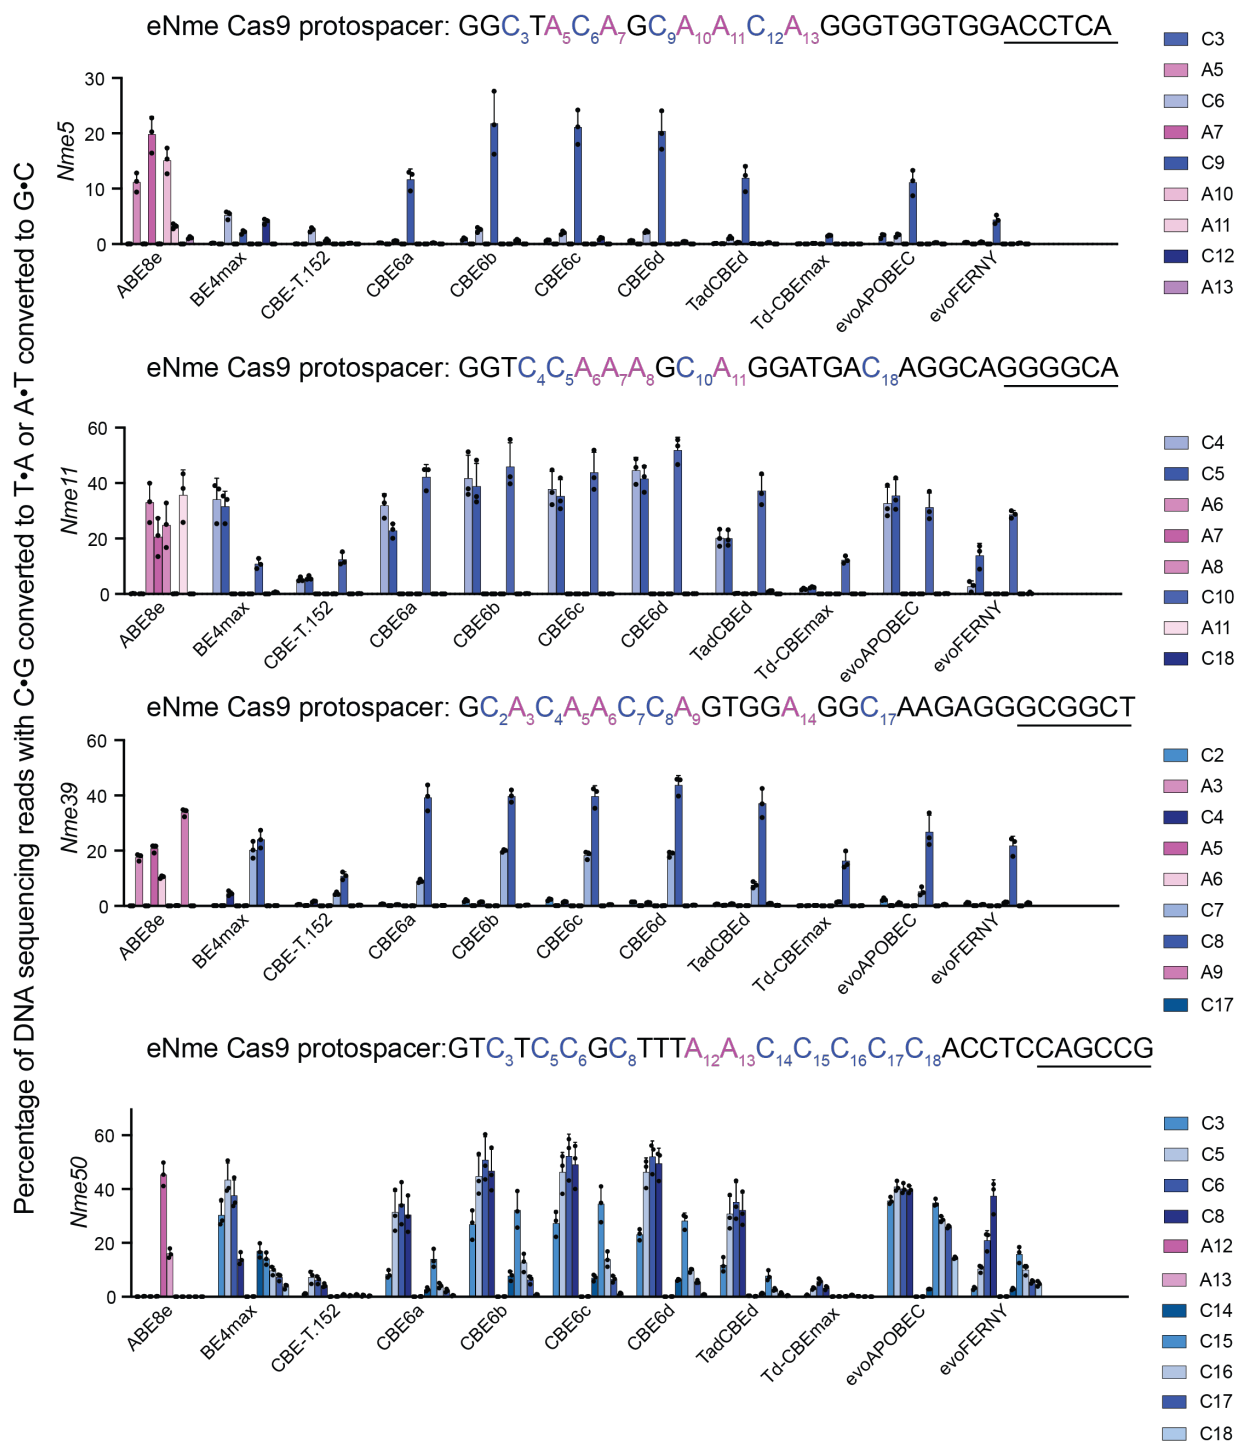

**Supplementary Figure 13. Full comparison of base editors at four eNmeC-Cas9 target sites.** The specified base editors using eNmeC-Cas9 nickases in the BE4max architecture were transfected into HEK293T cells with a guide RNA targeting the protospacer shown in each graph. Target cytosines are blue, target adenines are magenta, and PAM sequences are underlined. C•G-to-T•A base editing is shown in shades of blue, and A•T-to-G•C base editing is shown in magenta. Dots represent individual values and bar values represent mean±s.d. of n=3 independent biological replicates. Source data are provided as a Source Data file.

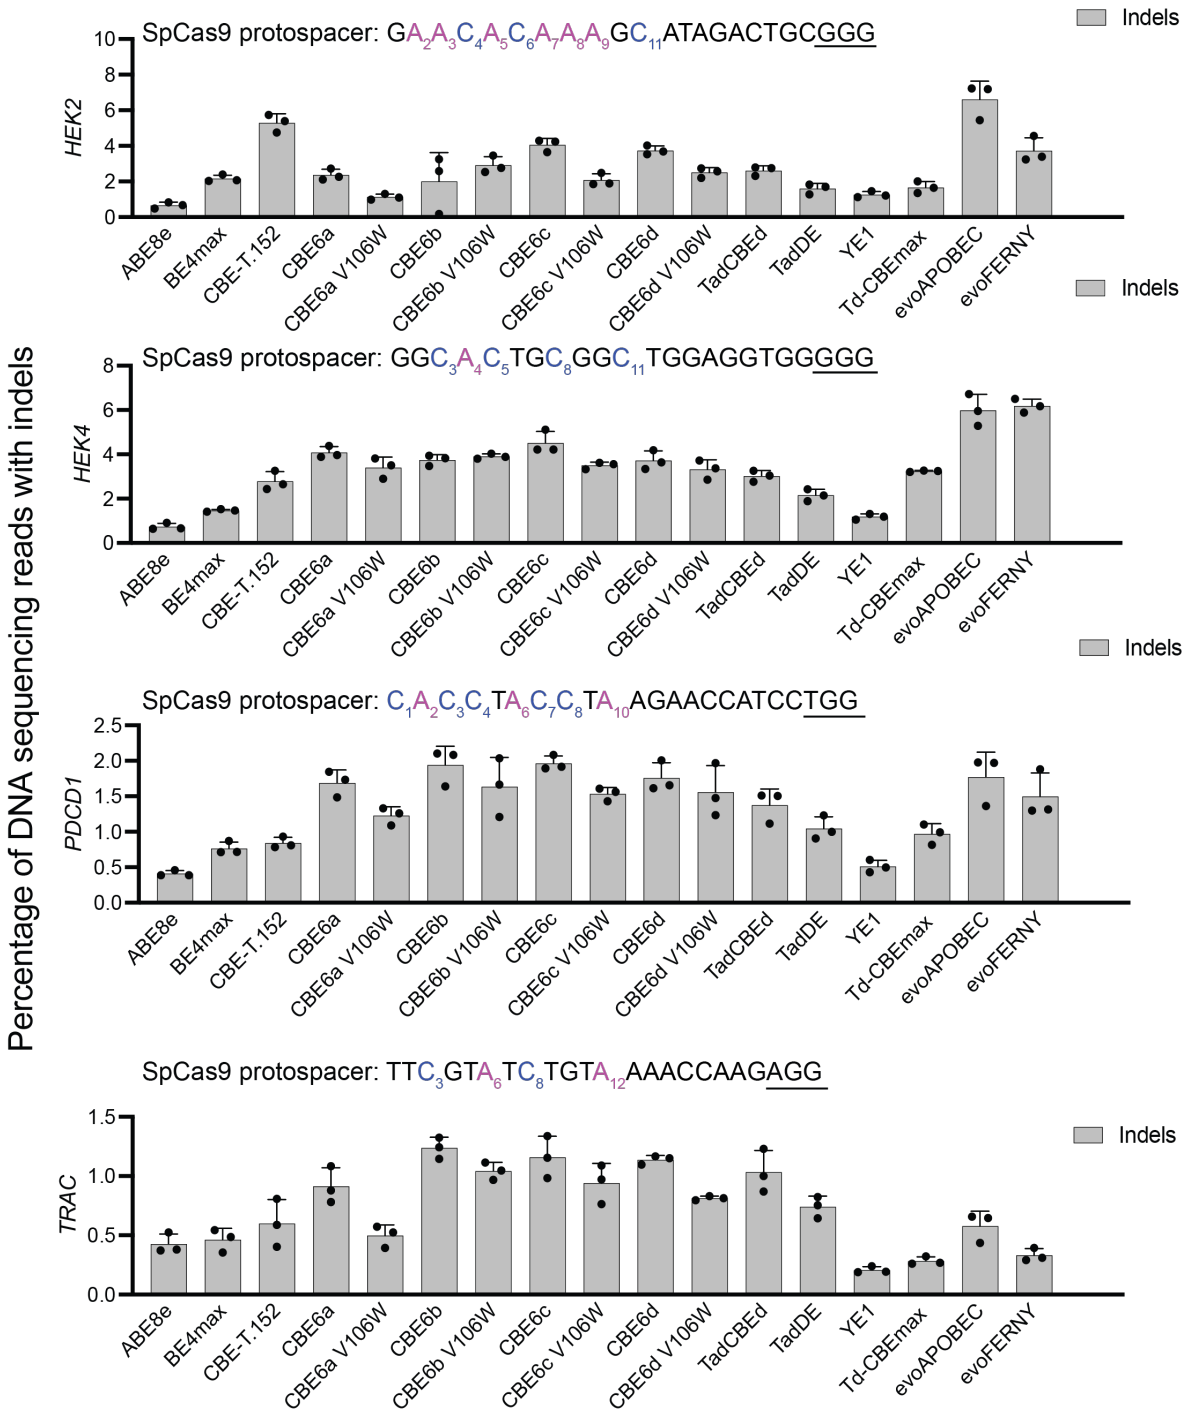

**Supplementary Figure 14. Indels by SpCas9 variants at four SpCas9 target sites.** The specified base editors using SpCas9 nickase domains in the BE4max architecture were transfected into HEK293T cells with a guide RNA targeting one of four genomic loci as shown in each graph. Target cytosines are blue, target adenines are magenta, and PAM sequences are underlined. Indels are shown in grey. Dots represent individual values and bar values represent mean $\pm$ s.d. of n=3 independent biological replicates. The data here are indels from the editing data presented in Supplementary Fig. 12. HEK293T site 2 is abbreviated *HEK2*, and HEK293T site 4 is abbreviated *HEK4*. Source data are provided as a Source Data file.

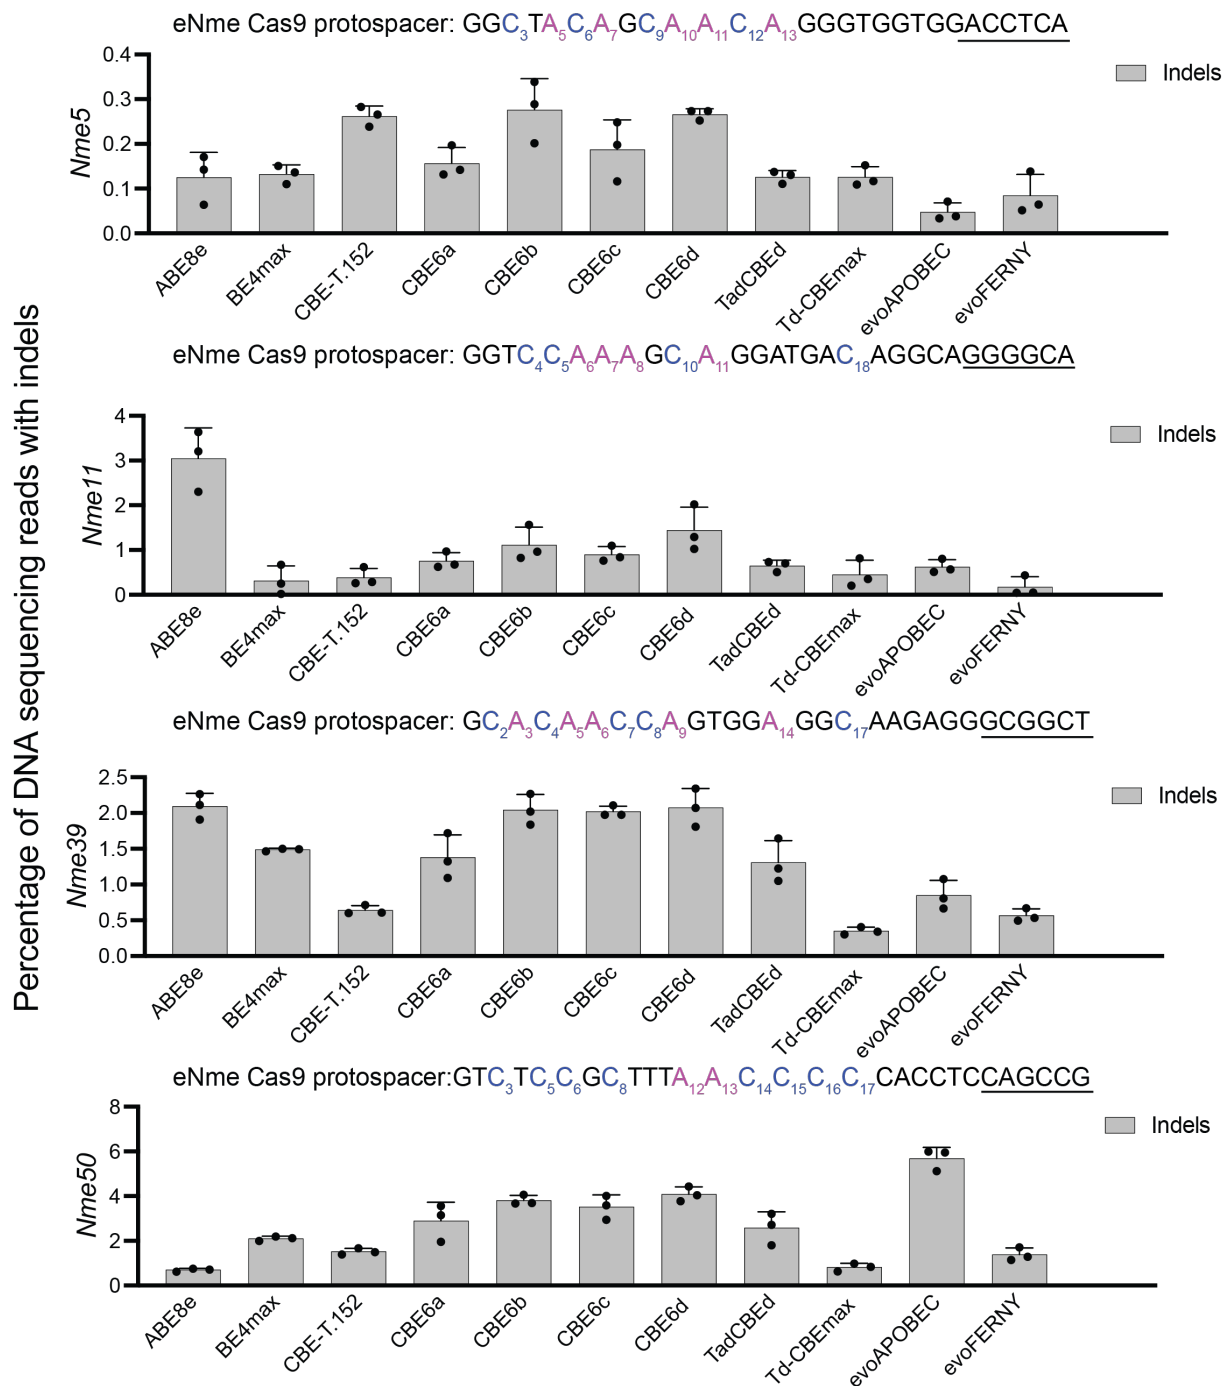

**Supplementary Figure 15. Indels by eNme2-C Cas9 variants at four eNme2-C Cas9 target sites.** The specified base editors using eNme2-C Cas9 nickase domains in the BE4max architecture were transfected into HEK293T cells with a guide RNA targeting one of four protospacers as shown in each graph. Target cytosines are blue, target adenines are magenta, and PAM sequences are underlined. Indels are shown in grey. Dots represent individual values and bar values represent mean±s.d. of n=3 independent biological replicates. The data here are indels from the editing data presented in Supplementary Fig. 13. Source data are provided as a Source Data file.

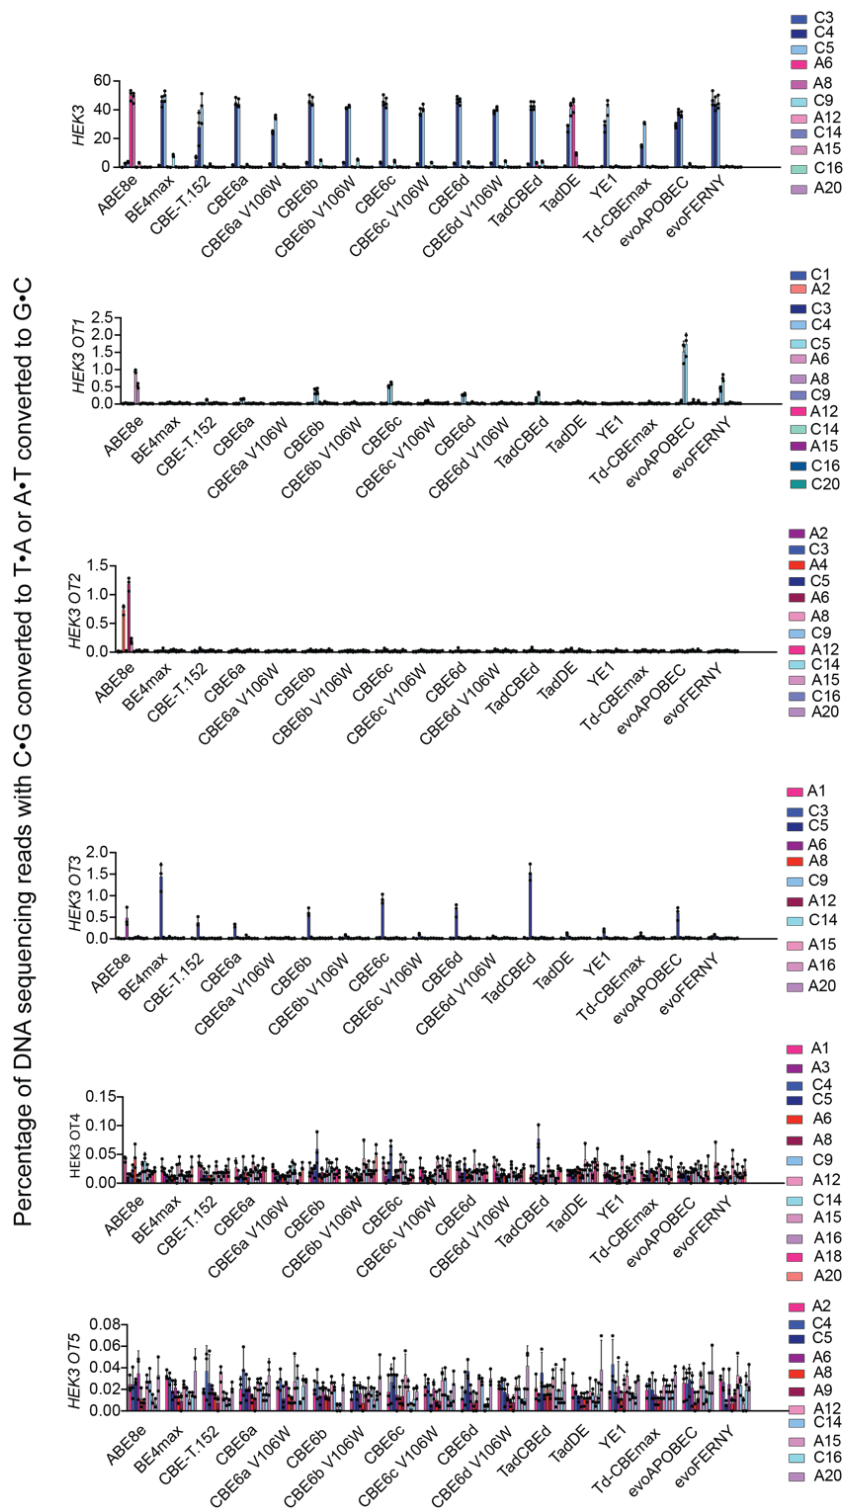

**Supplementary Figure 16. On-target and Cas-dependent editing of known off-target sites for *HEK3*.** CBE6 variants along with existing cytosine base editors with SpCas9 nickases in the BE4max architecture were transfected into HEK293T cells with a guide RNA targeting *HEK3*. HEK293T site 3 is abbreviated *HEK3*. Dots represent individual values and bar values represent mean $\pm$ s.d. of n=3 independent biological replicates. Source data are provided as a Source Data file.

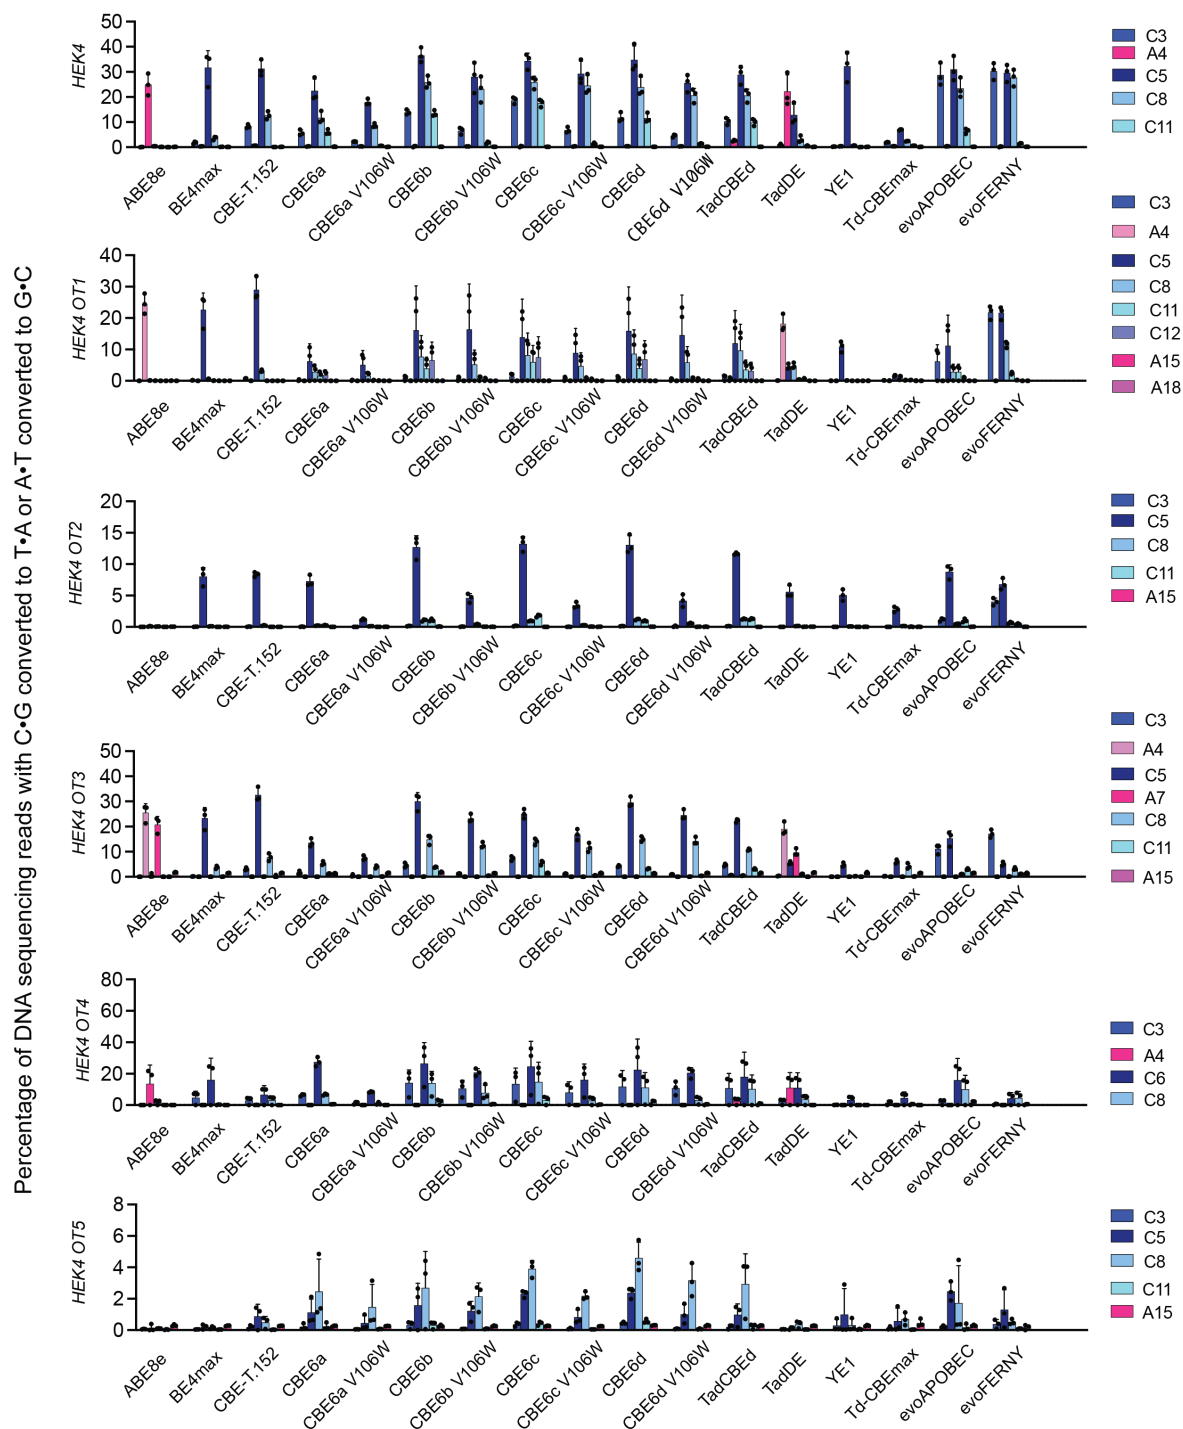

**Supplementary Figure 17. On-target and Cas-dependent editing of known off-target sites for *HEK4*.** CBE6 variants along with existing cytosine base editors with SpCas9 nickases in the BE4max architecture were transfected into HEK293T cells with a guide RNA targeting *HEK4*. HEK293T site 4 is abbreviated *HEK4*. Dots represent individual values and bar values represent mean $\pm$ s.d. of n=3 independent biological replicates. Source data are provided as a Source Data file.



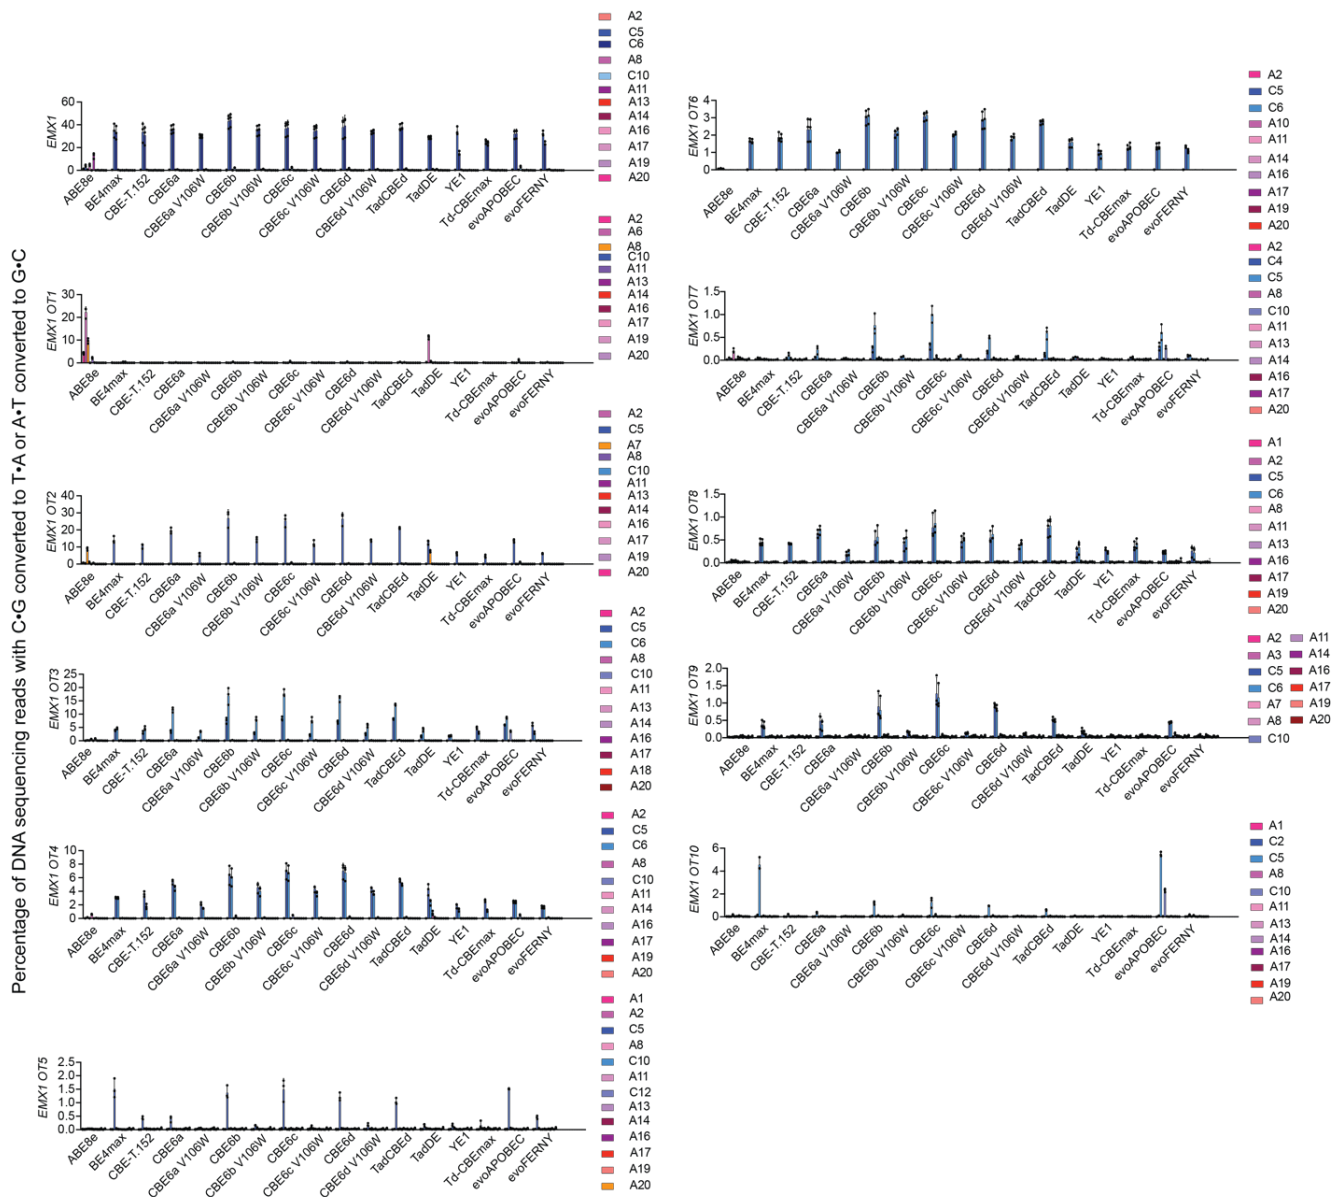

**Supplementary Figure 18. On-target and Cas-dependent editing of known off-target sites for *EMX1*.** CBE6 variants along with existing cytosine base editors with SpCas9 nickases in the BE4max architecture were transfected into HEK293T cells with a guide RNA targeting *EMX1*. Dots represent individual values and bar values represent mean $\pm$ s.d. of n=3 independent biological replicates. Source data are provided as a Source Data file.

Percentage of DNA sequencing reads with C•G converted to T•A or A•T converted to G•C

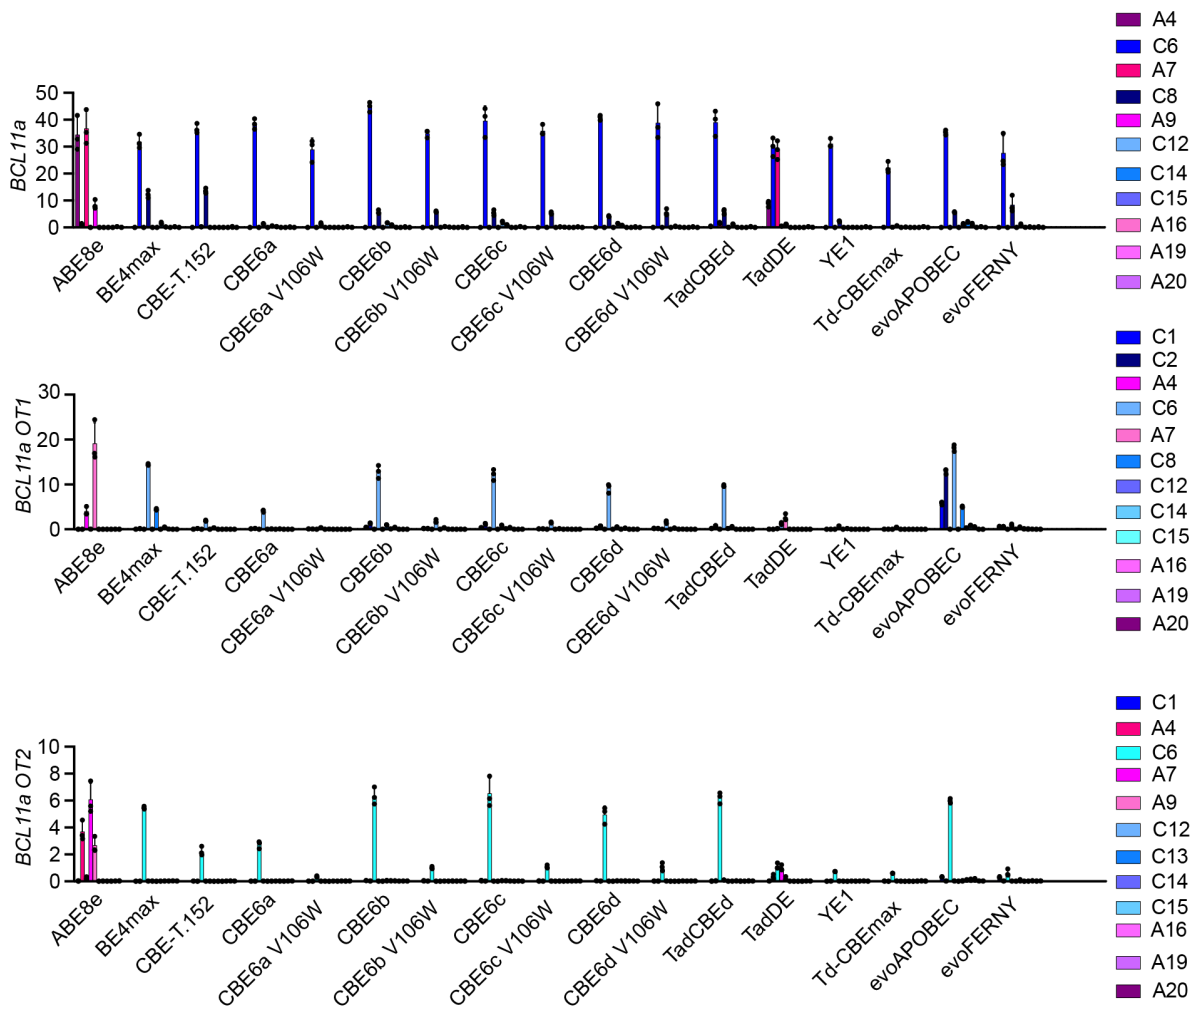

**Supplementary Figure 19. On-target and Cas-dependent editing of known off-target sites for *BCL11a*.** CBE6 variants along with existing cytosine base editors with SpCas9 nickases in the BE4max architecture were transfected into HEK293T cells with a guide RNA targeting *BCL11a*. Dots represent individual values and bar values represent mean $\pm$ s.d. of n=3 independent biological replicates. Source data are provided as a Source Data file.

Percentage of DNA sequencing reads with C•G converted to T•A or A•T converted to G•C

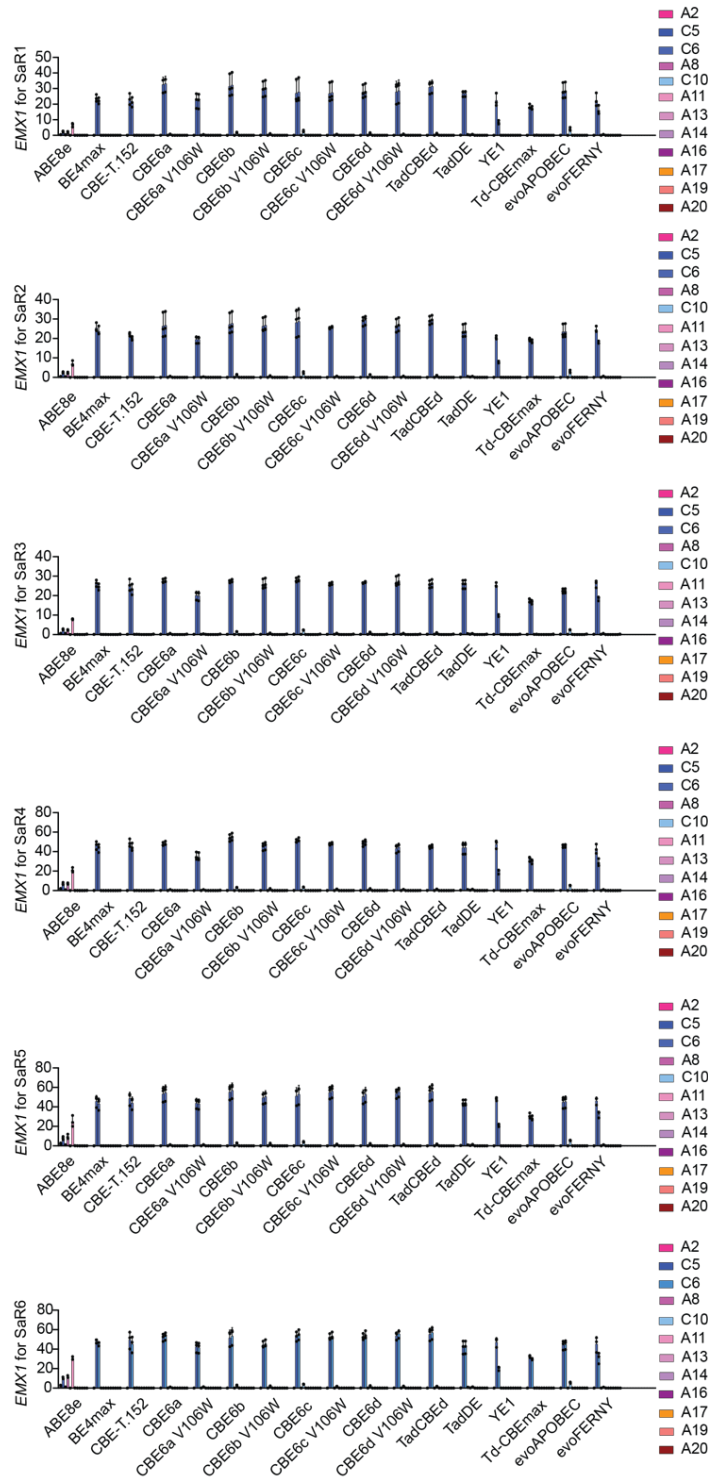

**Supplementary Figure 20. On-target editing at *EMX1* correlated to Cas-independent off-target editing.** CBE6 variants along with existing cytosine base editors with SpCas9 nickases in the BE4max architecture were transfected into HEK293T cells with an SpCas9 guide RNA targeting *EMX1* along with an SaCas9 guide RNA. Dots represent individual values and bar values represent mean $\pm$ s.d. of n=3 independent biological replicates. Source data are provided as a Source Data file.

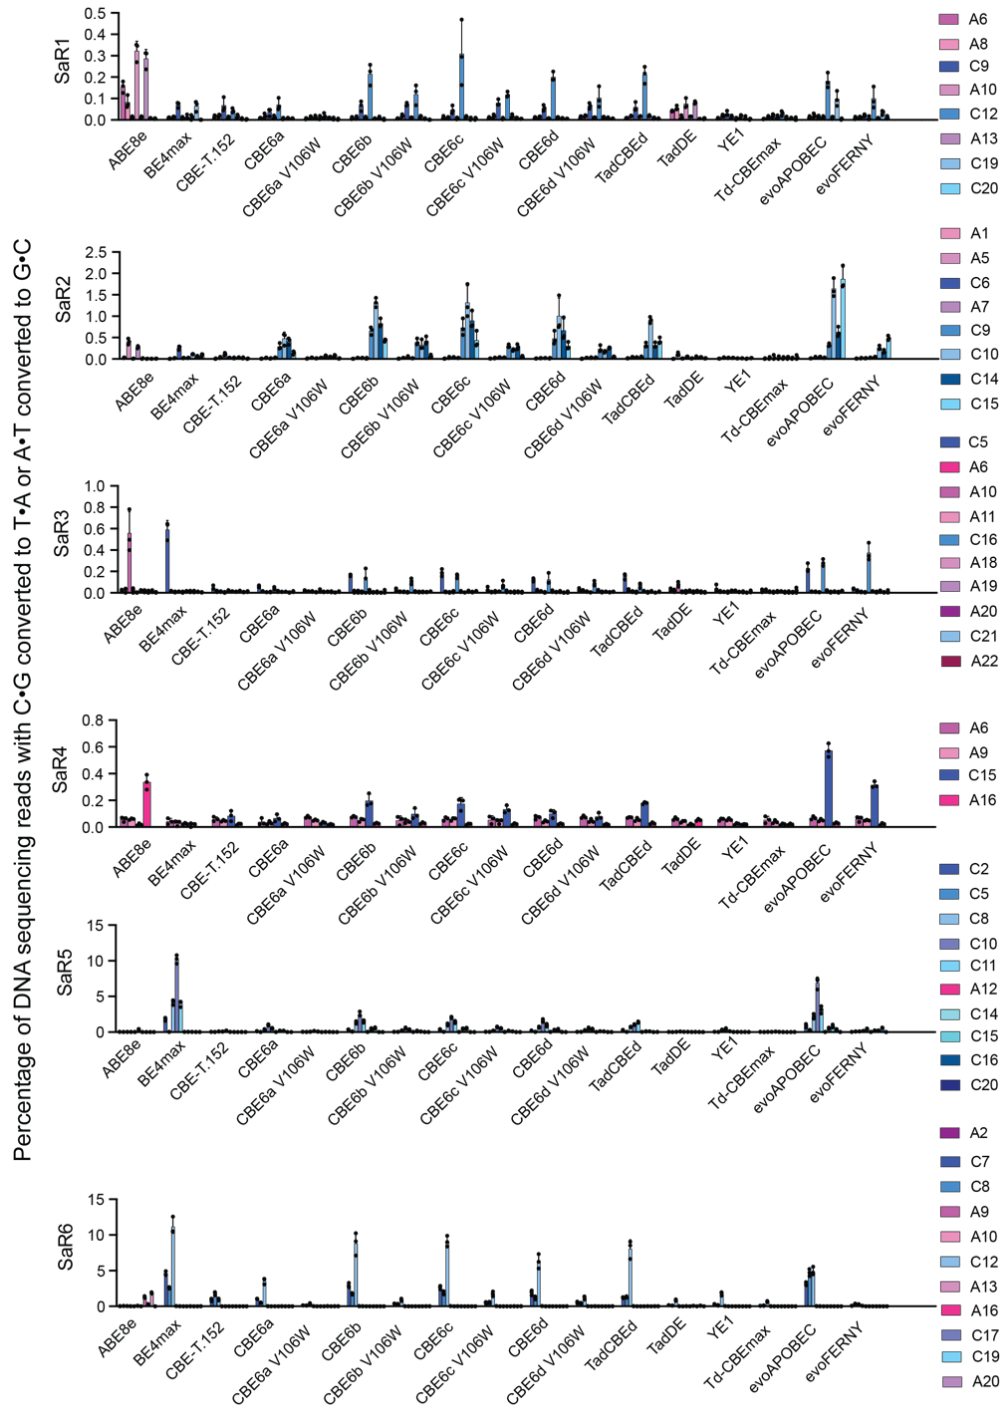

**Supplementary Figure 21. Cas-independent off-target editing at six genomic SaCas9 R-loops.** The orthogonal R-loop assay was performed on CBE variants in the BE4max architecture. HEK293T cells were transfected with the base editor and an SpCas9 sgRNA targeting *EMX1* as the on-target locus. Simultaneously, orthogonal dSaCas9 and an SaCas9 sgRNA corresponding to Sa sites 1–6 (SaR1–SaR6) were transfected in the same well. Dots represent individual biological replicates, and bar values represent mean $\pm$ s.d. from n=3 independent biological replicates. Source data are provided as a Source Data file.

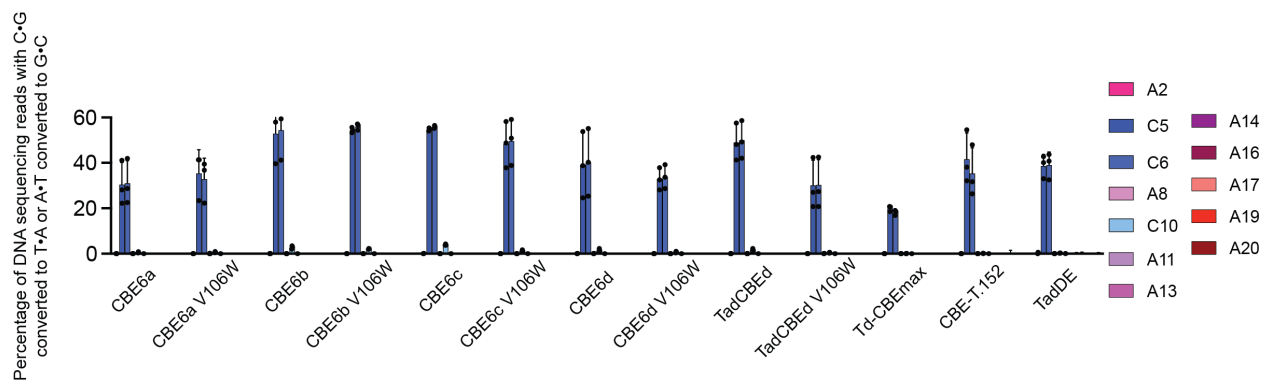

**Supplementary Figure 22. On-target editing at *EMX1* correlated to RNA off-target editing.** CBE6 variants along with existing cytosine base editors with SpCas9 nickases in the BE4max architecture were transfected into HEK293T cells in two plates. In one plate, RNA was harvested 48 hours after transfection, and in the other plate, genomic DNA was harvested. The genomic DNA was analyzed for on-target editing of *EMX1*. Dots represent individual values, and bar values represent mean $\pm$ s.d. of n=3 independent biological replicates. Source data are provided as a Source Data file.

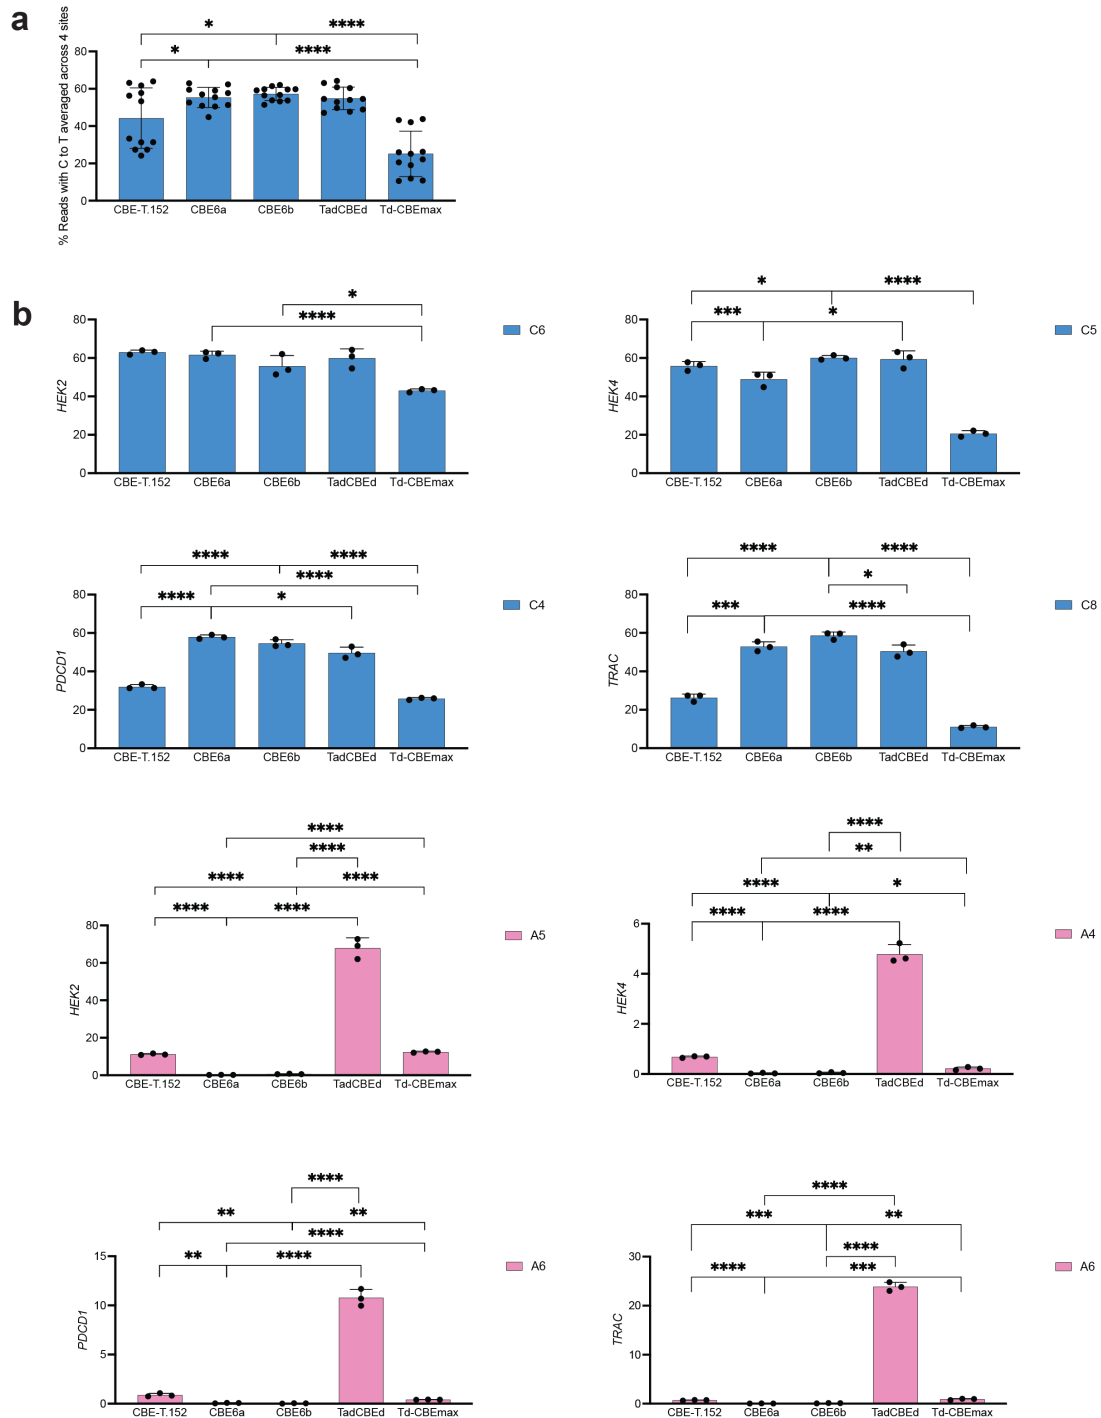

**Supplementary Figure 23. Comparison of peak editing of base editors at four SpCas9 target sites with statistical significance.** Each bar value is correlated to the peak editing presented in Supplementary Figure 12. *P* values were derived from a Student's two-tailed, unpaired *t*-test either from (a) an average of all sites or (b) per site tested. CBE6a and CBE6b were compared to TadCBEed, CBE-T.152, and Td-CBEmax individually. Dots represent individual values, and bar values represent mean±s.d. of n=3 independent biological replicates. HEK293T site 2 is abbreviated *HEK2*, and HEK293T site 4 is abbreviated *HEK4*. Source data are provided as a Source Data file.

**a**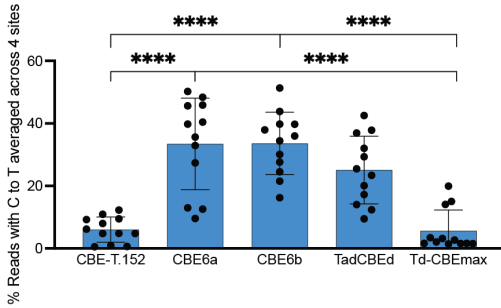**b**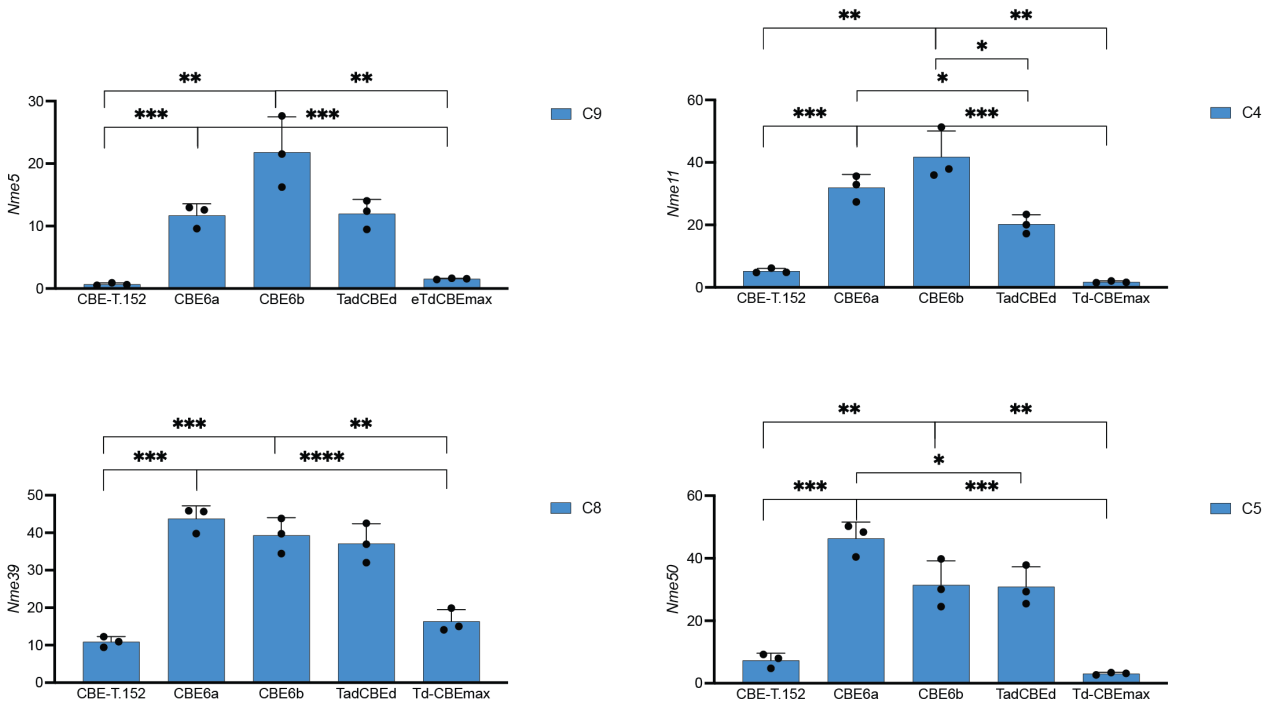

**Supplementary Figure 24. Comparison of peak editing of base editors at four eNme2C-Cas9 target sites with statistical significance.** Each bar value is correlated to the peak editing presented in Supplementary Figure 13. *P* values were derived from a Student's two-tailed, unpaired *t*-test either from (a) an average of all sites or (b) per site tested. CBE6a and CBE6b were compared to TadCBEed, CBE-T.152, and Td-CBEmax individually. Dots represent individual values, and bar values represent mean ± s.d. of *n*=3 independent biological replicates. Source data are provided as a Source Data file.

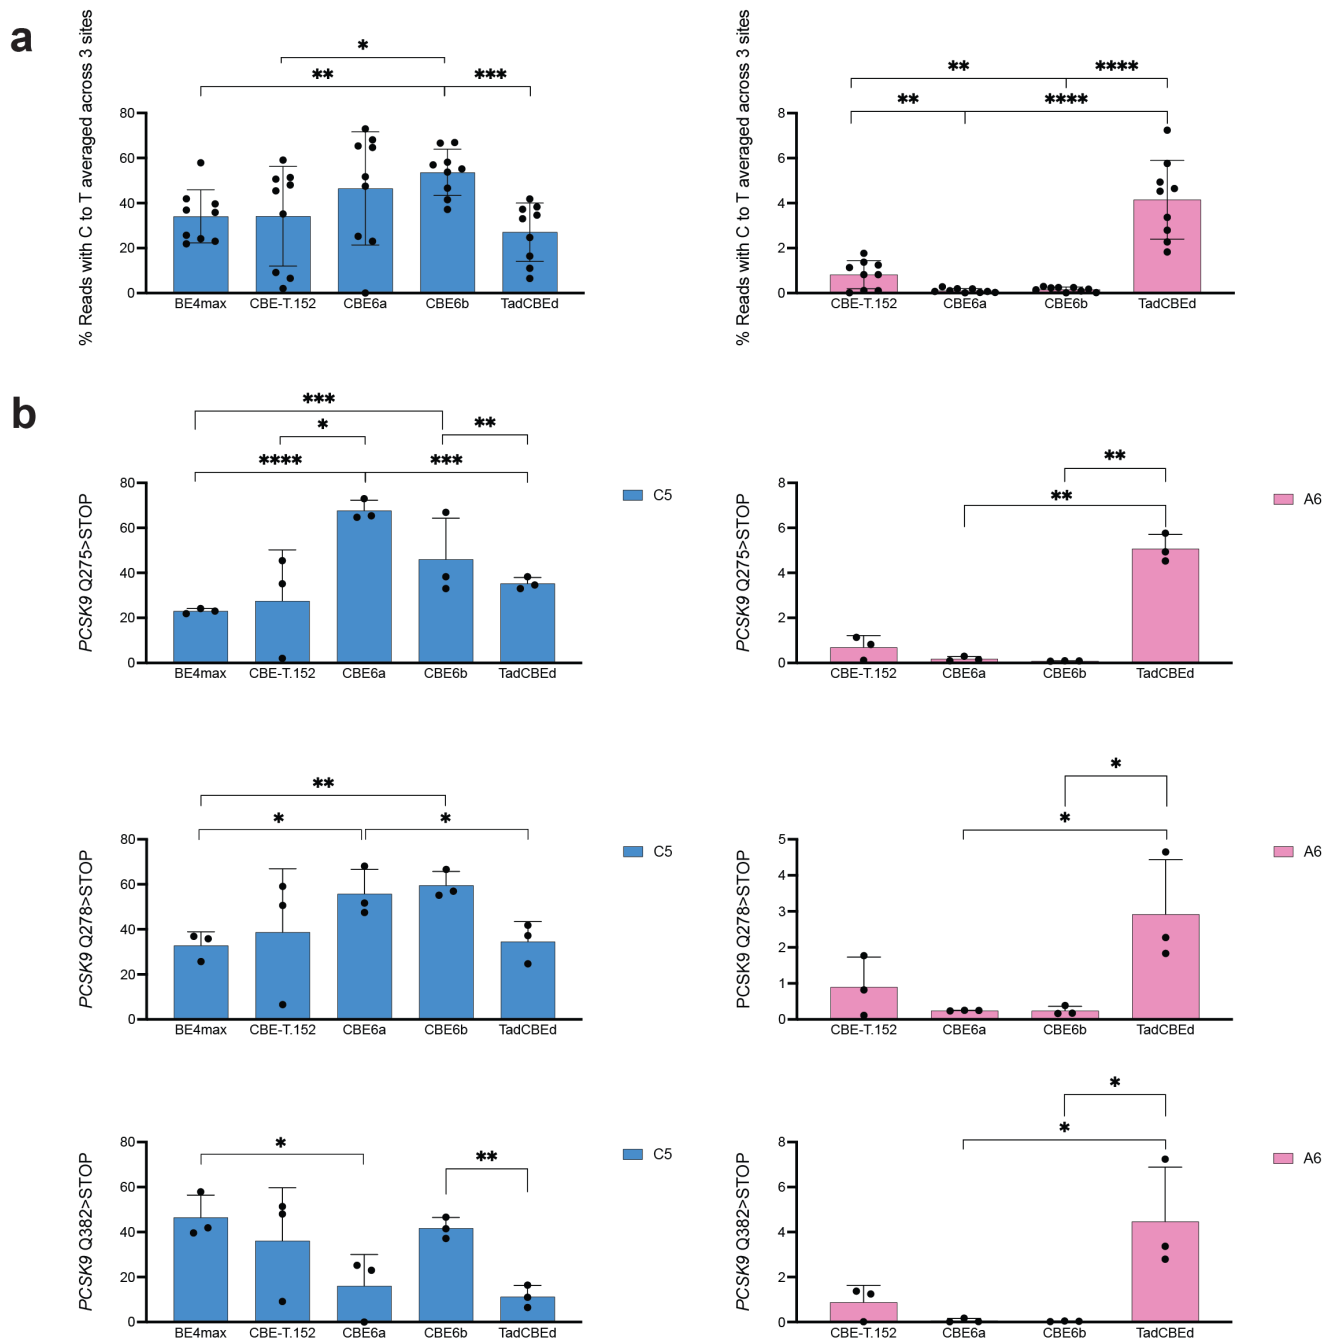

**Supplementary Figure 25. Peak editing of base editors at 3 *PCSK9* target sites with statistical significance.** Each bar value is correlated to the peak editing presented in Figure 5. *P* values were derived from a Student's two-tailed, unpaired *t*-test either from (a) an average of all sites or (b) per site tested. CBE6a and CBE6b were compared to TadCBEEd, CBE-T.152, and BE4max individually. Dots represent individual values, and bar values represent mean $\pm$ s.d. of  $n=3$  independent biological replicates. Source data are provided as a Source Data file.



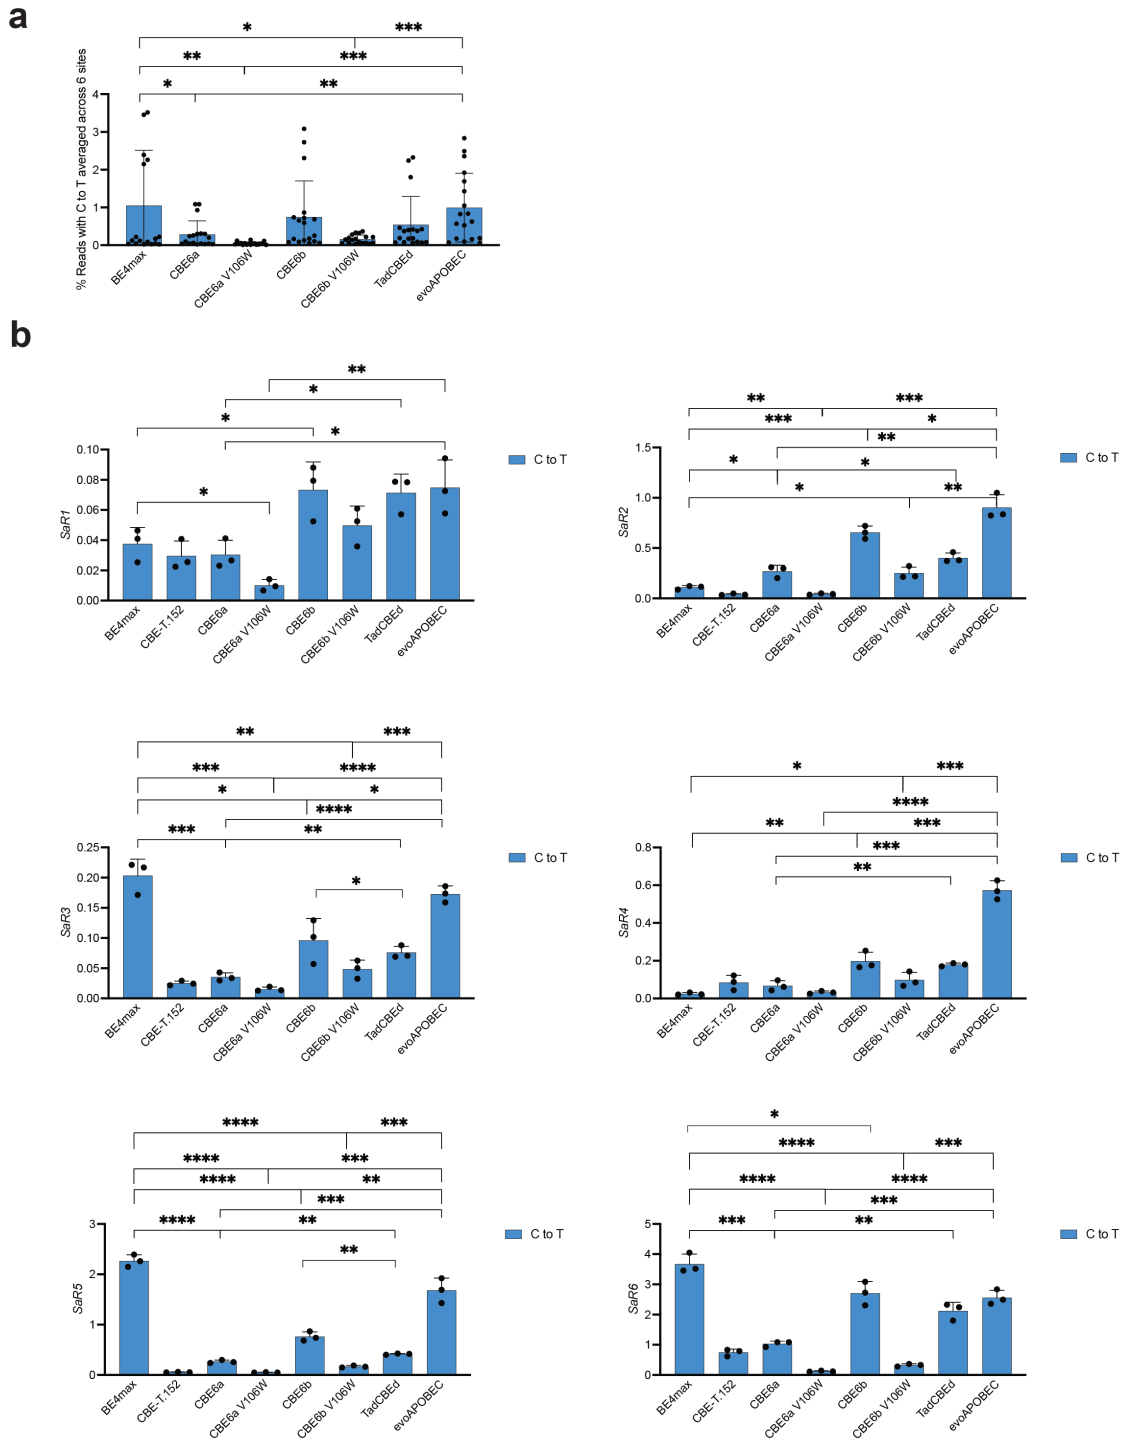

**Supplementary Figure 26. Cas-independent off-target editing at six genomic SaCas9 R-loops with statistical significance.** Each bar value is correlated to the peak editing presented in Figure 4a. *P* values were derived from a Student's two-tailed, unpaired *t*-test either from (a) an average of all sites or (b) per site tested. CBE6a and CBE6b were compared to TadCBE6d, evoAPOBEC and BE4max individually. CBE6a V106W and CBE6b V106W were compared to evoAPOBEC and BE4max individually. Dots represent individual values, and bar values represent mean $\pm$ s.d. of  $n=3$  independent biological replicates. Source data are provided as a Source Data file.

**a**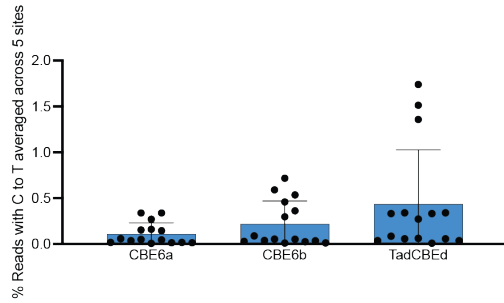**b**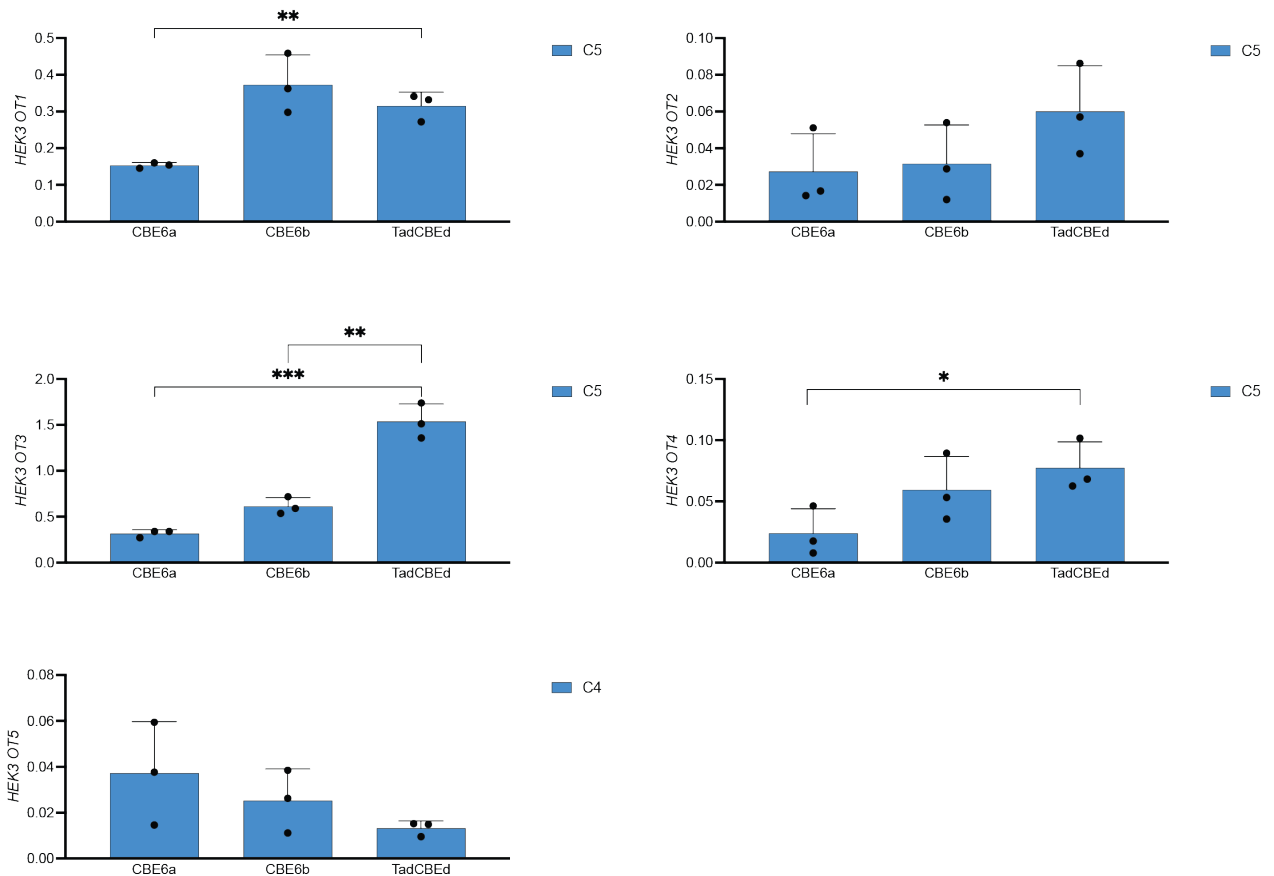

**Supplementary Figure 27. Cas-dependent off-target editing of peak editing of known off-target sites for *HEK3* with statistical significance.** Each bar value is correlated to the peak editing presented in Supplementary Figure 16. *P* values were derived from a Student's two-tailed, unpaired *t*-test either from (a) an average of all sites or (b) per site tested. CBE6a and CBE6b were compared to TadCBEed. Dots represent individual values, and bar values represent mean  $\pm$  s.d. of *n*=3 independent biological replicates. HEK293T site 3 is abbreviated *HEK3*. Source data are provided as a Source Data file.

**a**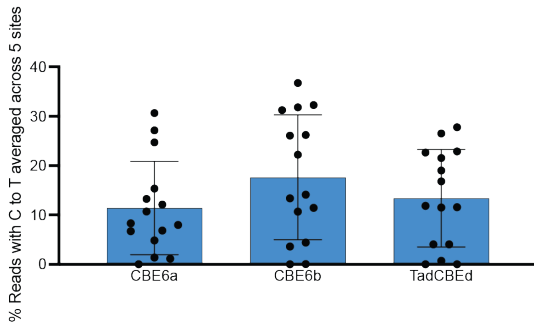**b**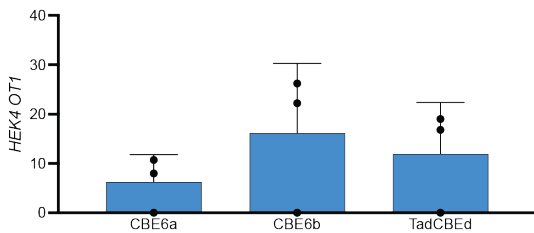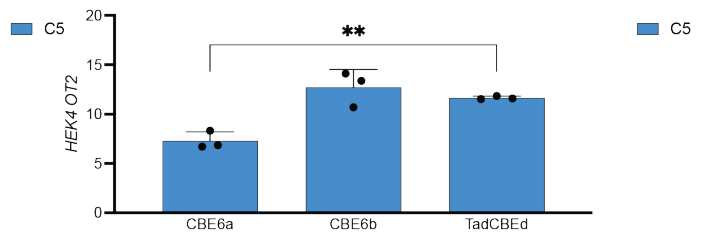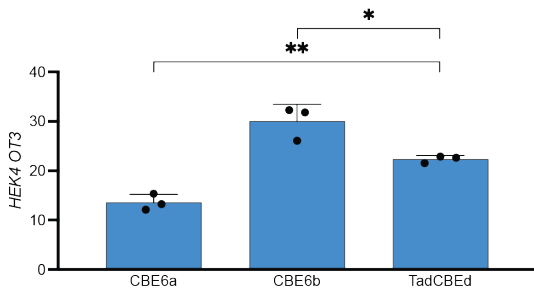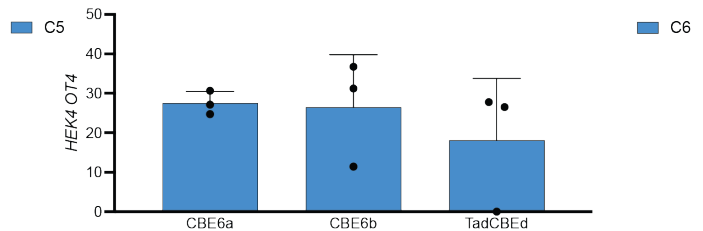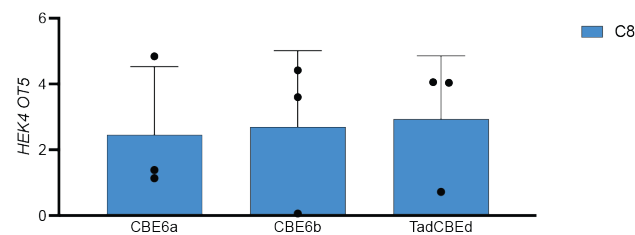

**Supplementary Figure 28. Cas-dependent off-target editing of peak editing of known off-target sites for HEK4 with statistical significance.** Each bar value is correlated to the peak editing presented in Supplementary Figure 17. *P* values were derived from a Student's two-tailed, unpaired *t*-test either from (a) an average of all sites or (b) per site tested. CBE6a and CBE6b were compared to TadCBEed. Dots represent individual values, and bar values represent mean  $\pm$  s.d. of  $n=3$  independent biological replicates. HEK293T site 4 is abbreviated HEK4. Source data are provided as a Source Data file.

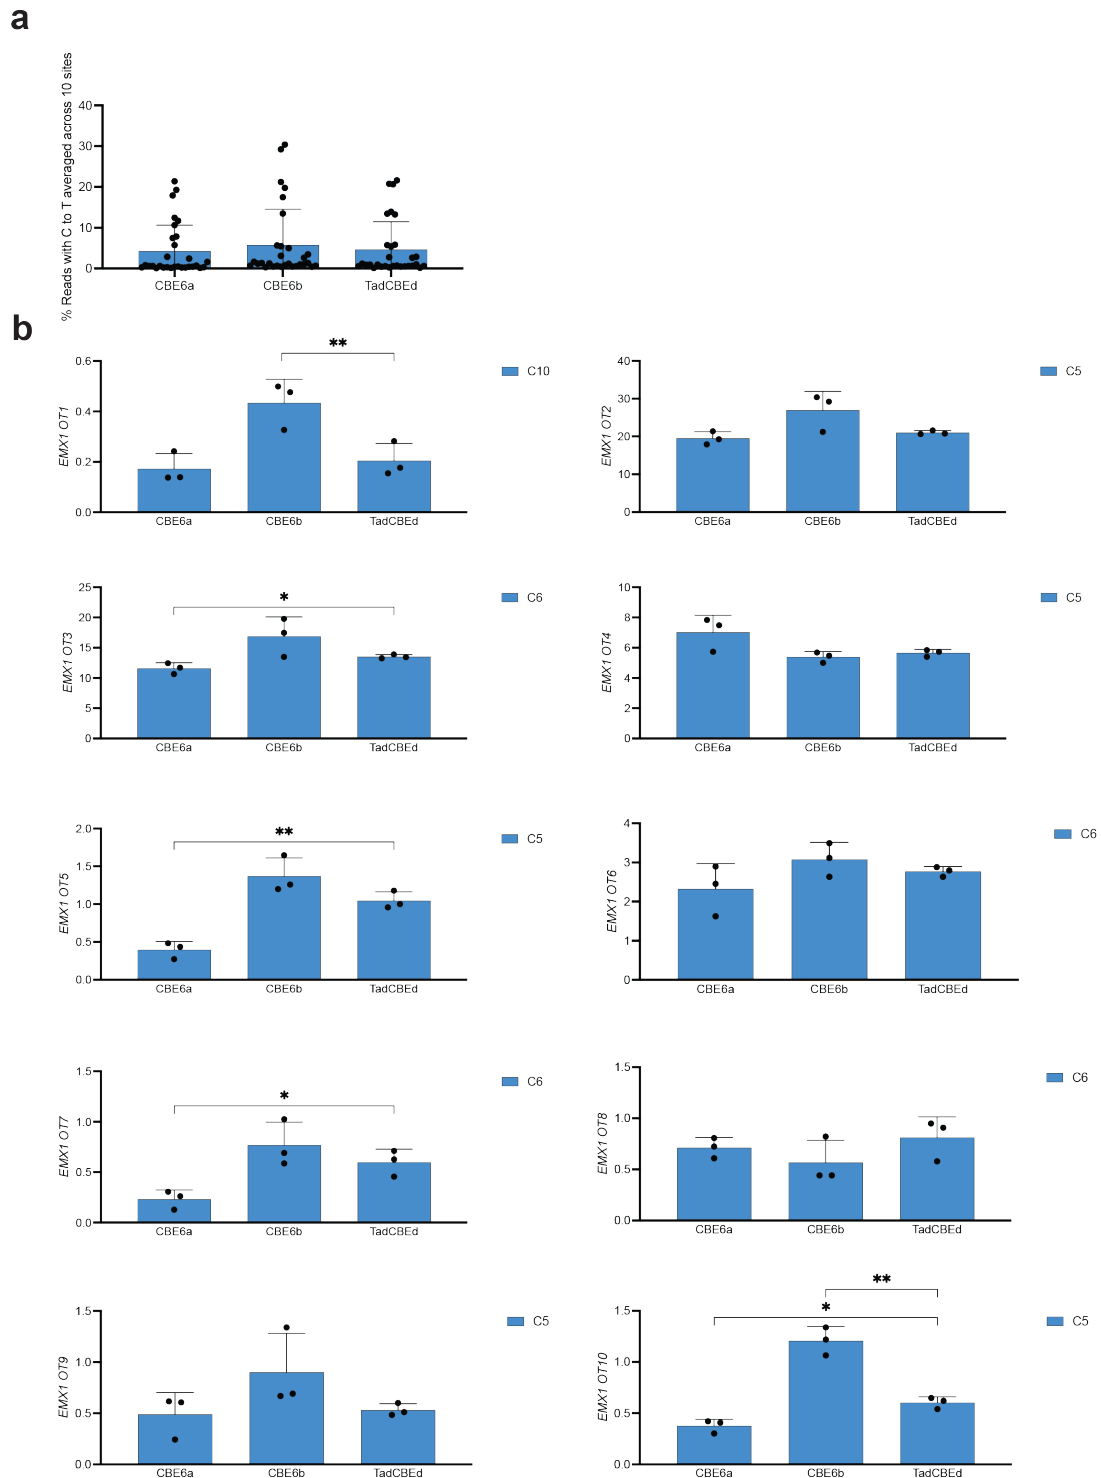

**Supplementary Figure 29. Cas-dependent off-target editing of peak editing of known off-target sites for *EMX1* with statistical significance.** Each bar value is correlated to the peak editing presented in Supplementary Figure 18. *P* values were derived from a Student's two-tailed, unpaired *t*-test either from (a) an average of all sites or (b) per site tested. CBE6a and CBE6b were compared to TadCBEed. Dots represent individual values, and bar values represent mean  $\pm$  s.d. of  $n=3$  independent biological replicates. Source data are provided as a Source Data file.

**a**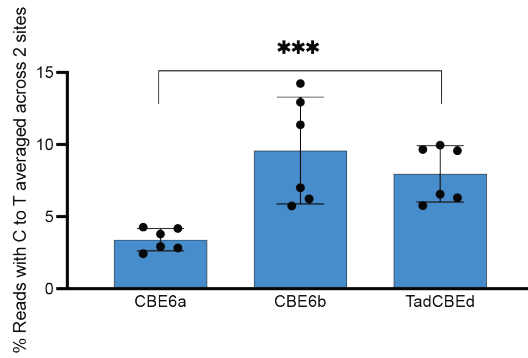**b**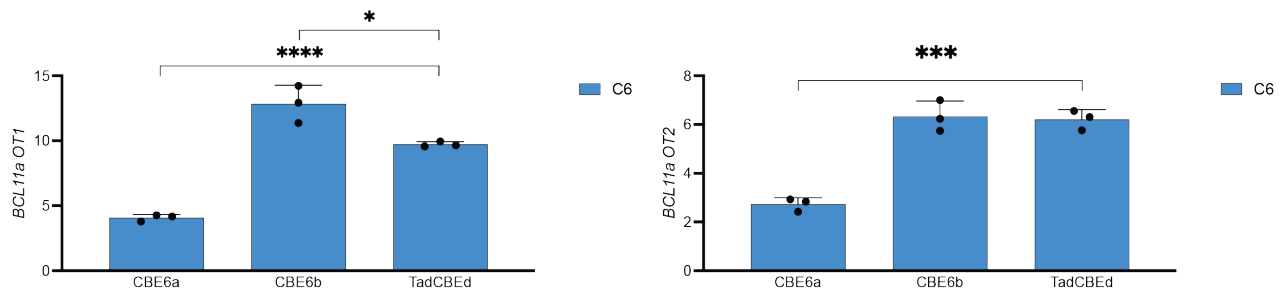

**Supplementary Figure 30. Cas-dependent off-target editing of peak editing of known off-target sites for *BCL11a* with statistical significance.** Each bar value is correlated to the peak editing presented in Supplementary Figure 19. *P* values were derived from a Student's two-tailed, unpaired *t*-test either from (a) an average of all sites or (b) per site tested. CBE6a and CBE6b were compared to TadCBEed. Dots represent individual values, and bar values represent mean $\pm$ s.d. of *n*=3 independent biological replicates. Source data are provided as a Source Data file.

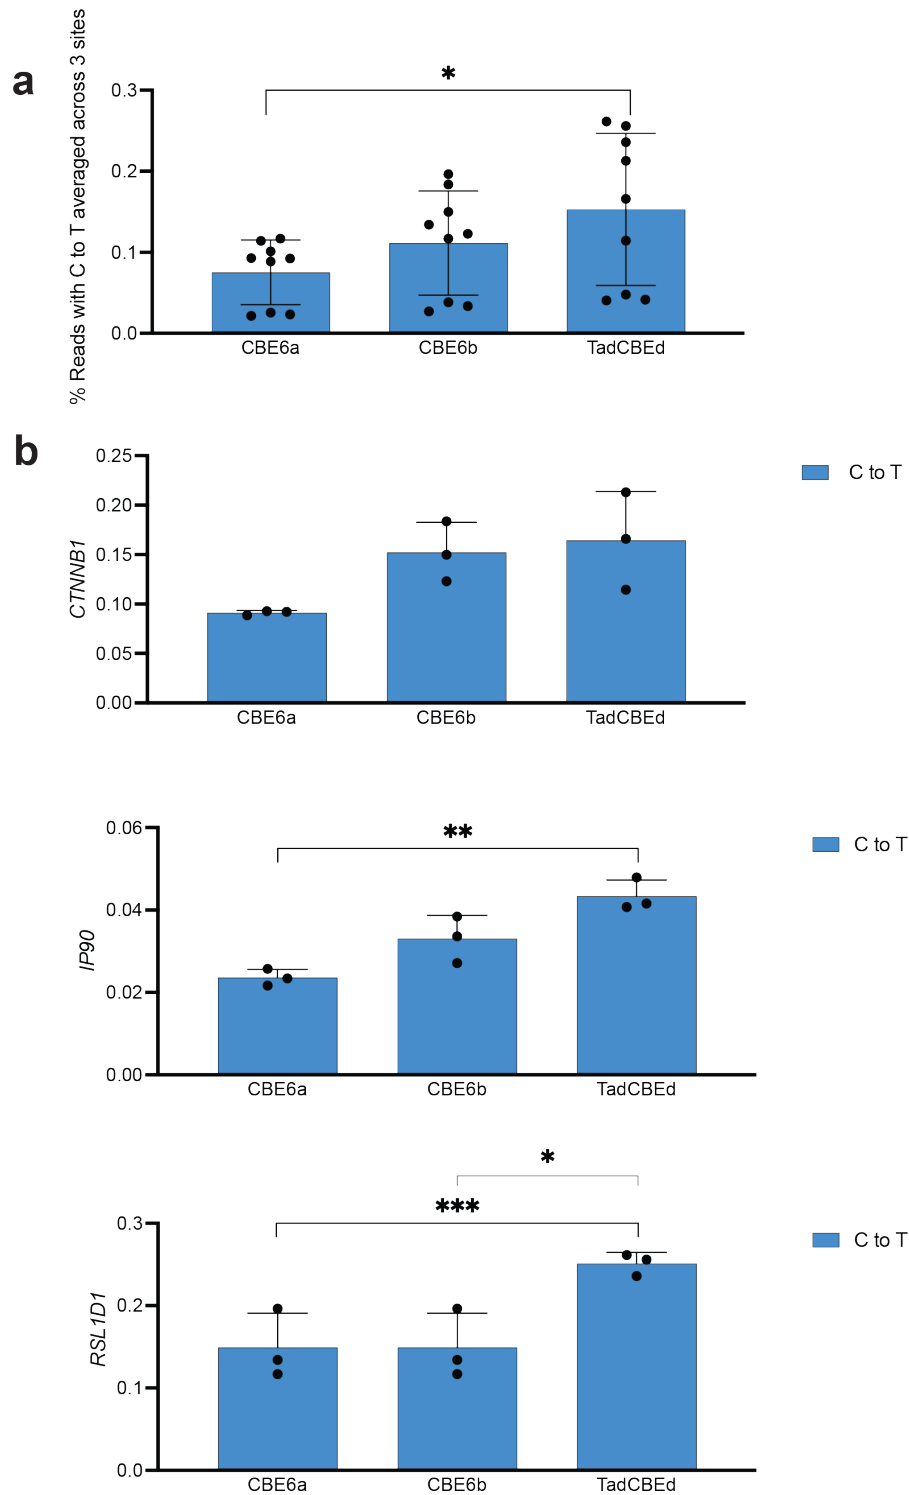

**Supplementary Figure 31. RNA off-target editing with statistical significance.**

Each bar value is correlated to the peak editing presented in Figure 4b. *P* values were derived from a Student's two-tailed, unpaired *t*-test either from (a) an average of all sites or (b) per site tested. CBE6a and CBE6b were compared to TadCBEed. Dots represent individual values, and bar values represent mean±s.d. of n=3 independent biological replicates. Source data are provided as a Source Data file.

**Supplementary Table 1.** Selectivity of TadDE-evolved CBEs calculated from *E. coli* profiling library (SD8, position 6). Selectivity is defined as the ratio of (mean CBE editing at position 6) to (mean ABE editing at position 6).

| <b>Variant</b>        | <b>Selectivity</b> |
|-----------------------|--------------------|
| TadCBE <sub>d</sub>   | 10.6               |
| CBE6 <sub>a</sub>     | 990.9              |
| CBE6 <sub>b</sub>     | 2089.0             |
| CBE6 <sub>c</sub>     | 1146.4             |
| CBE6 <sub>d</sub>     | 1298.7             |
| CBE-T1.52             | 185.6              |
| Td-CBE <sub>max</sub> | 224.6              |

**Supplementary Table 2.** Selectivity of TadDE-evolved CBEs calculated from *E. coli* profiling library (sd2, positions 4-8). Selectivity is defined as the geometric mean of (the ratio of (mean CBE editing at each position) to (mean ABE editing at each position)).

| <b>Variant</b>        | <b>Selectivity</b> |
|-----------------------|--------------------|
| TadCBE <sub>d</sub>   | 15.79              |
| CBE6 <sub>a</sub>     | 43.99              |
| CBE6 <sub>b</sub>     | 57.27              |
| CBE6 <sub>c</sub>     | 26.97              |
| CBE6 <sub>d</sub>     | 86.09              |
| CBE-T1.52             | 53.23              |
| Td-CBE <sub>max</sub> | 4.137              |



**Supplementary Table 3. Plasmids and selection phage (SP) used in this work.**

| Name         | Usage (resistance)                      | Origin     | ORF1                                     | ORF2         |
|--------------|-----------------------------------------|------------|------------------------------------------|--------------|
| pEZ0056      | Mammalian expression, SpCas9            | pUC        | pCMV.ABE8e-UGI-UGI                       |              |
| pEZ0058      | Mammalian expression, SpCas9            | pUC        | pCMV.TadCBEd                             |              |
| pEZ0062      | Mammalian expression, SpCas9            | pUC        | pCMV.CBE-T1.52                           |              |
| pEZ0064      | Mammalian expression, SpCas9            | pUC        | pCMV.eTdCBEmax                           |              |
| pEZ0069      | Mammalian expression, eNme2-C S6P       | pUC        | pCMV.CBE-T.152 (eNme2-C S6P)             |              |
| pEZ0071      | Mammalian expression, eNme2-C S6P       | pUC        | pCMV.eTdCBEmax                           |              |
| pEZ0116      | Mammalian expression, SpCas9            | pUC        | pCMV.TadDE N46V Y73P                     |              |
| pEZ0119      | Mammalian expression, SpCas9            | pUC        | pCMV.TadDEN46L Y73P                      |              |
| pEZ0120      | Mammalian expression, SpCas9            | pUC        | pCMV.TadDE N46C Y73P                     |              |
| pEZ0122      | Mammalian expression, eNme2-C S6P       | pUC        | pCMV.TadDE N46V Y73P (eNme2-C S6P)       |              |
| pEZ0125      | Mammalian expression, eNme2-C S6P       | pUC        | pCMV.TadDE N46L Y73P (eNme2-C S6P)       |              |
| pEZ0126      | Mammalian expression, eNme2-C S6P       | pUC        | pCMV.TadDE N46C Y73P (eNme2-C S6P)       |              |
| pEZ0138      | Mammalian expression, SpCas9            | pUC        | pCMV.TadDE N46V Y73P V106W               |              |
| pEZ0139      | Mammalian expression, SpCas9            | pUC        | pCMV.TadDE N46L Y73P V106W               |              |
| pEZ0140      | Mammalian expression, SpCas9            | pUC        | pCMV.TadDE N46C Y73P V106W               |              |
| pEZ0141      | Mammalian expression, SpCas9            | pUC        | pCMV.TadDE N46I Y73P V106W               |              |
| pEZ0149      | TadDE N46V Y73P IVT template            | pUC        |                                          |              |
| pEZ0150      | TadDE N46L Y73P IVT template            | pUC        |                                          |              |
| pEZ0151      | TadDE N46C Y73P IVT template            | pUC        |                                          |              |
| pEZ0152      | TadDE N46I Y73P IVT template            | pUC        |                                          |              |
| pEZ0157      | E. coli Library TadCBEd N46V (SpR)      | SC101      | pBAD.SD8.TadCBEd N46V.dSpCas9-UGI-UGI    |              |
| pEZ0158      | E. coli Library TadCBEd N46L (SpR)      | SC101      | pBAD.SD8.TadCBEd N46L.dSpCas9-UGI-UGI    |              |
| pEZ0159      | E. coli Library TadCBEd N46C (SpR)      | SC101      | pBAD.SD8.TadCBEd N46C.dSpCas9-UGI-UGI    |              |
| pEZ0160      | E. coli Library TadCBEd N46I (SpR)      | SC101      | pBAD.SD8.TadCBEd N46I.dSpCas9-UGI-UGI    |              |
| pEZ0165      | E. coli Library TadDE N46V Y73S (SpR)   | SC101      | pBAD.SD8.TadDE N46V.dSpCas9-UGI-UGI      |              |
| pEZ0166      | E. coli Library TadDE N46L Y73S (SpR)   | SC101      | pBAD.SD8.TadDE N46L.dSpCas9-UGI-UGI      |              |
| pEZ0167      | E. coli Library TadDE N46C Y73S (SpR)   | SC101      | pBAD.SD8.TadDE N46C.dSpCas9-UGI-UGI      |              |
| pEZ0168      | E. coli Library TadDE N46I Y73S (SpR)   | SC101      | pBAD.SD8.TadDE N46I.dSpCas9-UGI-UGI      |              |
| pEZ0169      | E. coli Library TadCBEd N46V Y73P (SpR) | SC101      | pBAD.SD8.TadDE N46V Y73P.dSpCas9-UGI-UGI |              |
| pEZ0170      | E. coli Library TadCBEd N46L Y73P (SpR) | SC101      | pBAD.SD8.TadDE N46L Y73P.dSpCas9-UGI-UGI |              |
| pEZ0171      | E. coli Library TadCBEd N46C Y73P (SpR) | SC101      | pBAD.SD8.TadDE N46C Y73P.dSpCas9-UGI-UGI |              |
| pEZ0172      | E. coli Library TadCBEd N46I Y73P (SpR) | SC101      | pBAD.SD8.TadDE N46I Y73P.dSpCas9-UGI-UGI |              |
| pEZ0177      | CBE-T1.52 IVT template                  | pUC        |                                          |              |
| SPEZ0001     | PA(N)CE, ΔgIII SP                       | M13 f1     | p_gIII.sD4.TadDE-NpuN                    |              |
| SPEZ0065     | PA(N)CE, ΔgIII SP                       | M13 f1     | p_gIII.sD4.NNK at N46 on TadDE-NpuN      |              |
| pMN573       | APOBEC1 (BE4max) IVT template           | pUC        |                                          |              |
| pMN574       | evoFERNY IVT template                   | pUC        |                                          |              |
| pMN575       | evoAPOBEC IVT template                  | pUC        |                                          |              |
| pMN580       | TadCBEd IVT template                    | pUC        |                                          |              |
| pMN582       | YE1 IVT template                        | pUC        |                                          |              |
| pMN599       | Mammalian expression, eNme2-C S6P       | pUC        | pCMV.ABE8e-UGI-UGI (eNme2-C S6P)         |              |
| pMN605       | Mammalian expression, eNme2-C S6P       | pUC        | pCMV.TadCBEd (eNme2-C S6P)               |              |
| pMN607       | Mammalian expression, eNme2-C S6P       | pUC        | pCMV.APOBEC1 (eNme2-C S6P)               |              |
| pMN608       | Mammalian expression, eNme2-C S6P       | pUC        | pCMV.evoFERNY (eNme2-C S6P)              |              |
| pMN609       | Mammalian expression, eNme2-C S6P       | pUC        | pCMV.evoAPOBEC (eNme2-C S6P)             |              |
| pMN790       | Mammalian expression, eNme2-C S6P       | pUC        | pCMV.TadDE N46I Y73P (eNme2-C S6P)       |              |
| pMN784       | Mammalian expression, SpCas9            | pUC        | pCMV.TadDE N46I Y73P                     |              |
| pMN793       | E. coli Library TadCBEd (SpR)           | SC101      | pBAD.sd2.TadCBEd.dSpCas9-UGI-UGI         |              |
| pMN794       | E. coli Library ABE8e (SpR)             | SC101      | pBAD.sd2.ABE8e.dSpCas9-UGI-UGI           |              |
| pMN795       | E. coli Library TadDE N46I Y73P (SpR)   | SC101      | pBAD.sd2.TadDE N46I Y73P.dSpCas9-UGI-UGI |              |
| pMN816       | E. coli Library ABE8e (SpR)             | SC101      | pBAD.SD8.ABE8e.dSpCas9-UGI-UGI           |              |
| pMN817       | E. coli Library TadCBEd (SpR)           | SC101      | pBAD.SD8.TadCBEd.dSpCas9-UGI-UGI         |              |
| pMN818       | E. coli Library TadDE (SpR)             | SC101      | pBAD.SD8.TadDE.dSpCas9-UGI-UGI           |              |
| pMN819       | E. coli Library TadDE N46I Y73P (SpR)   | SC101      | pBAD.SD8.TadDE N46I Y73P.dSpCas9-UGI-UGI |              |
| pMN831       | E. coli Library CBE-T1.52 (SpR)         | SC101      | pBAD.SD8.CBE-T1.52.dSpCas9-UGI-UGI       |              |
| pMN832       | E. coli Library eTdCBEmax (SpR)         | SC101      | pBAD.SD8.eTdCBEmax.dSpCas9-UGI-UGI       |              |
| pMN833       | E. coli Library TadDE N46C Y73P (SpR)   | SC101      | pBAD.SD8.TadDE N46C Y73P.dSpCas9-UGI-UGI |              |
| pMN834       | E. coli Library TadDE N46L Y73P (SpR)   | SC101      | pBAD.SD8.TadDE N46L Y73P.dSpCas9-UGI-UGI |              |
| pMN835       | E. coli Library TadDE N46V Y73P (SpR)   | SC101      | pBAD.SD8.TadDE N46V Y73P.dSpCas9-UGI-UGI |              |
| pMN837       | E. coli Library TadDE N46C Y73P (SpR)   | SC101      | pBAD.sd2.TadDE N46C Y73P.dSpCas9-UGI-UGI |              |
| pMN838       | E. coli Library TadDE N46L Y73P (SpR)   | SC101      | pBAD.sd2.TadDE N46L Y73P.dSpCas9-UGI-UGI |              |
| pMN839       | E. coli Library TadDE N46V Y73P (SpR)   | SC101      | pBAD.sd2.TadDE N46V Y73P.dSpCas9-UGI-UGI |              |
| pMN841       | E. coli Library CBE-T1.52 (SpR)         | SC101      | pBAD.sd2.CBE-T1.52.dSpCas9-UGI-UGI       |              |
| pMN842       | E. coli Library eTdCBEmax (SpR)         | SC101      | pBAD.sd2.eTdCBEmax.dSpCas9-UGI-UGI       |              |
| pBT44c       | Circuit (KmR)                           | p15a       | proC.SD8.intC.dCas9.UGI                  |              |
| pBT120b      | Circuit (CbR)                           | SC101-E93K | proT7.sd8.gIII.luxAB                     | proLac.sgRNA |
| pBT2dR3-proA | Circuit (SpR)                           | ColE1      | proA.SynRBS 0.4k.T7-RNAP-degron          |              |
| pBT2dR3-proB | Circuit (SpR)                           | ColE1      | proB.SynRBS 0.4k.T7-RNAP-degron          |              |
| pBT2dR3-proC | Circuit (SpR)                           | ColE1      | proC.SynRBS 0.4k.T7-RNAP-degron          |              |
| pBT2dR3-proD | Circuit (SpR)                           | ColE1      | proD.SynRBS 0.4k.T7-RNAP-degron          |              |
| pBT280       | Mammalian expression, SpCas9            | pUC        | pCMV.evoFERNY                            |              |
| pBT281       | Mammalian expression, SpCas9            | pUC        | pCMV.evoAPOBEC                           |              |
| pBT290       | Mammalian expression, SpCas9            | pUC        | pCMV.APOBEC1 (BE4max)                    |              |

**Supplementary Table 4.** Promoter and RBS sequences for plasmids and phage used in evolution.

| Name    | Promoter/RBS | Description                                                                 | Sequence                                                                                                                                                                                                 |
|---------|--------------|-----------------------------------------------------------------------------|----------------------------------------------------------------------------------------------------------------------------------------------------------------------------------------------------------|
| SP      | PgIII        | Promoter for TadA*-NpuN on phage                                            | AATTCACCTCGAAAGCAAGTTGATAAAC<br>TGATACAATTAAGGCTCCT                                                                                                                                                      |
| SP      | RBS          | RBS for expression of TadA*-NpuN on phage                                   | AAGGAGGAAAA                                                                                                                                                                                              |
| P1      | ProC         | Promoter for NpuC-dCas9-ugi                                                 | CACAGCTAACACCACGTCGTCCCTATCT<br>GCTGCCCTAGGTCTATGAGTGGTTGCTG<br>GATAACTTTACGGGCATGCATAAGGCTC<br>GTATGATATATTCAGGGAGACCACAACG<br>GTTTCCCTCTACAATAATTTTGTTTAACT<br>TTTACTAGAGTGGGACCCCTACCTGCAGG<br>TGCAGT |
| P1      | SD8          | RBS for expression of NpuC-dCas9-ugi                                        | AAGGAGGAAAAAAAA                                                                                                                                                                                          |
| P2      | pLac         | Promoter for sgRNA                                                          | GGCTTTACACTTTATGCTCCGCTCGTA<br>TGTTGTGG                                                                                                                                                                  |
| P2      | proT7        | T7 promoter controls gIII transcription                                     | TAATACGACTCACTATAGGGAGA                                                                                                                                                                                  |
| P2      | sd8          | RBS for expression of gIII                                                  | AAGGAAAAAAAA                                                                                                                                                                                             |
| P3      | ProA         | Promoter for T7RNAP. Varies by stringency (A is weakest, most stringent)    | CACAGCTAACACCACGTCGTCCCTATCT<br>GCTGCCCTAGGTCTATGAGTGGTTGCTG<br>GATAACTTTACGGGCATGCATAAGGCTC<br>GTAGGCTATATTCAGGGAGACCACAACG<br>GTTTCCCTCTACAATAATTTTGTTTAACT<br>TTTACTAGAGTGGGACCCCTACCTGCAGG<br>TGCAGT |
| P3      | ProB         | Promoter for T7RNAP. Varies by stringency.                                  | CACAGCTAACACCACGTCGTCCCTATCT<br>GCTGCCCTAGGTCTATGAGTGGTTGCTG<br>GATAACTTTACGGGCATGCATAAGGCTC<br>GTAATATATATTCAGGGAGACCACAACG<br>GTTTCCCTCTACAATAATTTTGTTTAACT<br>TTTACTAGAGTGGGACCCCTACCTGCAGG<br>TGCAGT |
| P3      | ProC         | Promoter for T7RNAP. Varies by stringency.                                  | CACAGCTAACACCACGTCGTCCCTATCT<br>GCTGCCCTAGGTCTATGAGTGGTTGCTG<br>GATAACTTTACGGGCATGCATAAGGCTC<br>GTATGATATATTCAGGGAGACCACAACG<br>GTTTCCCTCTACAATAATTTTGTTTAACT<br>TTTACTAGAGTGGGACCCCTACCTGCAGG<br>TGCAGT |
| P3      | ProD         | Promoter for T7RNAP. Varies by stringency (D is strongest, least stringent) | CACAGCTAACACCACGTCGTCCCTATCT<br>GCTGCCCTAGGTCTATGAGTGGTTGCTG<br>GATAACTTTACGGGCATGCATAAGGCTC<br>GTATAATATATTCAGGGAGACCACAACG<br>GTTTCCCTCTACAATAATTTTGTTTAACT<br>TTTACTAGAGTGGGACCCCTACCTGCAGG<br>TGCAGT |
| P3      | RBSR3        | RBS for expression of T7 RNAP                                               | ACTACATCATCAGGC                                                                                                                                                                                          |
| Library | sd2          | RBS for expression of the editor                                            | AAAAAAAAAGGAAA                                                                                                                                                                                           |
| Library | SD8          | RBS for expression of the editor                                            | AAGGAGGAAAAAAAA                                                                                                                                                                                          |
| Library | sd5          | RBS for expression of the editor                                            | AAAAAAGGAAAAA                                                                                                                                                                                            |

**Supplementary Table 5.** cDNA amplicon sequences and primers for RNA off-target analysis.

| Name   | Amplicon                                                                                                                                                                                                                                                                 | HTS-F                                                                       | HTS-R                                                          |
|--------|--------------------------------------------------------------------------------------------------------------------------------------------------------------------------------------------------------------------------------------------------------------------------|-----------------------------------------------------------------------------|----------------------------------------------------------------|
| RSL1D1 | TTGGCTTTCCAAATCAGTGGGTCTGACTTGAGGTCTGTGATG<br>TGACCCTTTTCCCTCACCTGCTCAACCATTATTCAC<br>ATGGACTCCATCATATTCATTTGTAGTCATTCCCAGAGT<br>GGCCAGTGAGGGTCTCGCTGTATGAGAGTCGGCTAC<br>GGAATTTAGGAGAAACAGAAGTTTCTTGGCTTTCATGCT<br>GAGCTTGTTGGTCTAAGCTTATGAG                            | ACACTCTTCCCT<br>ACACGACGCTCT<br>TCCGATCTNNNN<br>TGGCTTTCCAAAT<br>CAGTGGGTC  | TGGAGTTCAGACG<br>TGTGCTCTCCGA<br>TCTCTATAAGCTT<br>AGACCAACAAGC |
| CTNNB1 | TTTGATGGAGTTGGACATGGCCATGGAACCAGACAGAAAAG<br>CGGCTGTTAGTCACTGGCAGCAACAGTCTTACCTG<br>GACTCTGGAATCCATTCTGGTGCCACTACCACAGCTCC<br>TTCTCTGAGTGGTAAAGGCAATCCTGAGGAAGAGGATG<br>TGGATACCTCCCAAGTCCTGTATGAGTGGGAACAGGGA<br>TTTTCTCAGTCCTTCACTCAAGAACAAGTAGCTGG                    | ACACTCTTCCCT<br>ACACGACGCTCT<br>TCCGATCTNNNN<br>ATTTGATGGAGTT<br>GGACATGGCC | TGGAGTTCAGACG<br>TGTGCTCTCCAGC<br>TACTTGTTCTTGAG<br>TGAAGG     |
| IP90   | CTGGTTGACCAATCTGTGGTGAATAGTGGAAATCTGCT<br>CAATGACATGACTCCTCCTGTAATCCTTACGTGAAAT<br>TGAGGACCCAGAAGACCGGAAGCCGAGGATTGGGAT<br>GAAAGACCAAAAATCCCAGATCCAGAAGCTGTCAAGCC<br>AGATGACTGGGATGAAGATGCCCTGCTAAGATTCCAG<br>ATGAAGAGGCCACAAAACCCGAAGGCTGGTTAGATGAT<br>GAGCCTGAGTACGTAC | ACACTCTTCCCT<br>ACACGACGCTCT<br>TCCGATCTNNNN<br>CTGGTTGACCAA<br>TCTGTGGTG   | TGGAGTTCAGACG<br>TGTGCTCTCTGCG<br>TCTGGATCAGGTA<br>CG          |

**Supplementary Table 6.** Primers for generating base editor amplicons for IVT.

| <b>Name</b> | <b>Sequence</b>                                                                               |
|-------------|-----------------------------------------------------------------------------------------------|
| IVT-F       | TCGAGCTCGGTACCTAATACGACTCACTATAAGG                                                            |
| IVT-R       | TTTTTTTTTTTTTTTTTTTTTTTTTTTTTTTTTTTTTTTTTTTTTTTTTTTTTTTTTTTTCTTCCTACTCA<br>GGCTTTATTCAAAGACCA |

**Supplementary Table 7.** Chemically synthesized guide RNAs used for fibroblast experiments.

| Site Name          | Protospacer                  | PAM | Amplicon                                                                                                                                                                                                                                                                                                                             | HTS-F                                                                | HTS-R                                                   |
|--------------------|------------------------------|-----|--------------------------------------------------------------------------------------------------------------------------------------------------------------------------------------------------------------------------------------------------------------------------------------------------------------------------------------|----------------------------------------------------------------------|---------------------------------------------------------|
| PCSK9<br>Q275>STOP | AAGCCAGC<br>TGGTCCAG<br>CCTG | TGG | CGCAGCAGCATTTCCTACTGGCTTTTGACCAAAC<br>ATCAGGCCACAAAAGTTGATCCCCAAAATTAACC<br>ATCACTCTGTGCCTGTAAGGGAGGGGGTGGGA<br>AAGGGGAGCAGGTCTCCCAAGGGGTGACCTT<br>GGCTTTGTTCTCCAGGCCTGGAGTTTATTTCG<br>GAAAAGCCAGCTGGTCCAGCCTGTGGGGCCAC<br>TGGTGGTGCTGCTGCCCTGGCGGGTGGGTAC<br>AGCCGCGTCTCAACGCCGCTGCCAGCGCCT<br>GGCGAGGGCTGGGGTCGTGCTGGTCACC         | ACACTCTTCCCTACAC<br>GACGCTCTCCGATCT<br>NNNNCGCAGCAGCATT<br>TCCACTGG  | TGGAGTTCAGACGTGTGC<br>TCTCCGATCTGGTGACCA<br>GCACGACCCAG |
| PCSK9<br>Q278>STOP | GGTCCAGC<br>CTGTGGGG<br>CCAC | TGG | CGCAGCAGCATTTCCTACTGGCTTTTGACCAAAC<br>ATCAGGCCACAAAAGTTGATCCCCAAAATTAACC<br>ATCACTCTGTGCCTGTAAGGGAGGGGGTGGGA<br>AAGGGGAGCAGGTCTCCCAAGGGGTGACCTT<br>GGCTTTGTTCTCCAGGCCTGGAGTTTATTTCG<br>GAAAAGCCAGCTGGTCCAGCCTGTGGGGCCAC<br>TGGTGGTGCTGCTGCCCTGGCGGGTGGGTAC<br>AGCCGCGTCTCAACGCCGCTGCCAGCGCCT<br>GGCGAGGGCTGGGGTCGTGCTGGTCACC         | ACACTCTTCCCTACAC<br>GACGCTCTCCGATCT<br>NNNNCGCAGCAGCATT<br>TCCACTGG  | TGGAGTTCAGACGTGTGC<br>TCTCCGATCTGGTGACCA<br>GCACGACCCAG |
| PCSK9<br>Q382>STOP | GTCACAGA<br>GTGGGACA<br>TCAC | AGG | GTCATCACAGTTGGGGCCACCAATGCCAAGAC<br>CAGCCGGTGACCCTGGGACTTTGGGGACCAA<br>CTTTGGCCGCTGTGTGGACCTTTTGGCCAGG<br>GGAGGACATCATTGGTGCCTCCAGCGACTGCA<br>GCACCTGCTTTGTGTACAGAGTGGGACATCAC<br>AGGCTGCTGCCACGTGGCTGGTAAGTCACCA<br>CCCCACTGCCTCGGCCACCGTGATGCTAACAGC<br>CCCTTTGGCAGTCAGGGTCTGTGCCGGGACCTC<br>CAGTGCCAGGCTCTGTGCAGGGGGACAGAGA<br>TG | ACACTCTTCCCTACAC<br>GACGCTCTCCGATCT<br>NNNNGTACATCACAGTT<br>GGGGCCAC | TGGAGTTCAGACGTGTGC<br>TCTCCGATCTCATCTCTG<br>GTCCCCTGCAC |

## **Supplementary Note 1. Evolved deaminase amino acid sequences.**

*CBE6a:*

MSEVEFSHEYWMRHALTLAKRARDEGEAPVGAVLVLNLRVIGEGWIRRIGLHDPTAHAEIM  
ALRQGGLVMQNPRLIDATLYVTFEPCVMCAGAMINSRIGRVVFGVRNSKRGAAAGSLMNVLN  
YPGMNHRVEITEGILADECAALLCDFYRMPRQVFNAQKKAQSSIN

*CBE6b:*

MSEVEFSHEYWMRHALTLAKRARDEGEAPVGAVLVLNLRVIGEGWVRRIGLHDPTAHAEIM  
ALRQGGLVMQNPRLIDATLYVTFEPCVMCAGAMINSRIGRVVFGVRNSKRGAAAGSLMNVLN  
YPGMNHRVEITEGILADECAALLCDFYRMPRQVFNAQKKAQSSIN

*CBE6c:*

MSEVEFSHEYWMRHALTLAKRARDEGEAPVGAVLVLNLRVIGEGWLRRIGLHDPTAHAEIM  
ALRQGGLVMQNPRLIDATLYVTFEPCVMCAGAMINSRIGRVVFGVRNSKRGAAAGSLMNVLN  
YPGMNHRVEITEGILADECAALLCDFYRMPRQVFNAQKKAQSSIN

*CBE6d:*

MSEVEFSHEYWMRHALTLAKRARDEGEAPVGAVLVLNLRVIGEGWCRRIGLHDPTAHAEIM  
ALRQGGLVMQNPRLIDATLYVTFEPCVMCAGAMINSRIGRVVFGVRNSKRGAAAGSLMNVLN  
YPGMNHRVEITEGILADECAALLCDFYRMPRQVFNAQKKAQSSIN

## **Supplementary Note 2. Sequences of Cas9 domains.**

*SpCas9 D10A:*

DKKYSIGLAIGTNSVGWAVITDEYKVPSKKFKVLGNTDRHSIKKNLIGALLFDSGETAEARLKR  
TARRRYTRRKNRICYLQEIFSNEMAKVDDSSFFHRLEESFLVEEDKKHERHPIFGNIVDEVAYH  
EKYPTIYHLRKKLVDSTDKADLRLIYLALAHMIKFRGHFLIEGDLNPDNSDVKLFIQLVQTYN  
QLFEENPINASGVDAKAILSARLSKSRLENLIAQLPGEKKNGLFGNLIASLGLTPNFKSNFD  
LAEDAKLQLSKDQYDDDLDNLLAQIGDQYADLFLAAKNLSDAILLSDILRVNTEITKAPLSASMI  
KRYDEHHQDLTLLKALVRQQLPKEYKEIFFDQSKNGYAGYIDGGASQEEFYKFIKPILEKMDG  
TEELLVKLNREDLLRKQRTFDNGSIPHQIHLGELHAILRRQEDFYFPLKDNREKIEKILTRIPY  
YVGPLARGNSRFAWMTRKSEETITPWNFEEVVDKGASAQSFIERMTNFDKNLPNEKVLPKH  
SLLYEYFTVYNELTKVKYVTEGMRKPAFLSGEQKKAIVDLLFKTNRKVTVKQLKEDYFKKIEC

FDSVEISGVEDRFNASLGTYHDLLKIIKDKDFLDNEENEDILEDIVLTLTLFEDREMIEERLKTY  
AHLFDDKVMKQLKRRRYTGWGRSRKLINGIRDKQSGKTILDFLKSDGFANRNFMQLIHDDSL  
TFKEDIQKAQVSGQGDSLHEHIANLAGSPAIKKGILQTVKVVDELVKVMGRHKPENIVIEMAR  
ENQTTQKGQKNSRERMKRIEIEGKELGSQILKEHPVENTQLQNEKLYLYLQNGRDMYVDQ  
ELDINRLSDYDVDHIVPQSFLKDDSIDNKVLTRSDKNRGKSDNVPSEEVVKKMKNYWRQLLN  
AKLITQRKFDNLTKAERGGLSELDKAGFIKRQLVETRQITKHVAQILDSRMNTKYDENDKLIRE  
VKVITLKSKLVSDFRKDFQFYKVVREINNYHHAHDAYLNAVVGTAIIKKYPKLESEFVYGDYKV  
YDVRKMIKSEQEIGKATAKYFFYSNIMNFFKTEITLANGEIRKRPLIETNGETGEIVWDKGRD  
FATVRKVLSPQVNIVKKTEVQTGGFSKESILPKRNSDKLIARKKDWDPKKYGGFDSPTVAY  
SVLVVAKVEKGGKSKKLKSVKELLGITIMERSSEFEKNPIDFLEAKGYKEVKKDLIIKLPYSLFELE  
NGRKRMLASAGELQKGNELALPSKYVNFLYLASHYEKLGKSPEDNEQKQLFEQHKHYLDEII  
EQISEFSKRVLADANLDKVL SAYNKHRDKPIREQAENIIHLFTLTNLGAPAFKYFDT  
TIDRKRYTSTKEVL DATLIHQ SITGLYETRIDLSQLGGD

*eNme2-C Cas9 (S6P mutation relative to reported eNme2-C sequence):*

AAFKNPNIYILGLAIGIASVGWAMVEIDEEENPIRLIDLGVRFERAEVPKTGDSLAMARRLA  
RSVRRLTRRRRAHRLLRARRLLKREGVLQAADFENGLIKSLPNTPWQLRAAALDRKLTPL  
WSAVLLHLIKHRGYLSQRKNEGETADKELGALLKGVANNAHALQTGDFRTPAELALNKFEKE  
SGHIRNQRGDYSHTF SRKDLQAE LILLFEKQKEFGNPHVSGGLKEGIETLLMTQRPALSGDA  
VQKMLGHCTFEPAPKAAKNTYTAERFIWLTKLNNLRILEQGSERPTDTERATLMDEPYRKS  
KLTYAQARKLLGLEDTAFFKGLRYGKDNAEASTLMEMKAYHAISRALEKEGLKDKKSPNLNS  
SELQDEIGTAFSLFKTDEDITGRLKDRVQPEILEALLKHISFDKQVQISLALRRIVPLMEQGKR  
YDEACAEIYGDHYGKKNTEEKIYLPPIPADEIRNPVVLALSQARKVINGVRRYVGGSPARIHET  
AREVGKSFKDRKEIEKRQEENRKDREKAAAKFRYFPNFVGEPKSKDILKLRLYEQQHGKCLY  
SGKEINLVRLNEKGYVEIDAALPFSRTWDDFNNKVLVLGSENQNKGNQTPYEYFNGKDNSR  
EWQEFKARVETSRFPRSKKQRILLQKFEDEDFKECNLDTRYVNRFLCQFVADHILLTGKGGK  
RRVFASNGQITNLLRGFWGLRKVRAENDRHHALDAVVACSTVAMQQKITRFVRYKEMNAF  
DGKTIDKETGKVLHQKTHFPQPWEFFAQEVMIRVFGKPDGKPEFEEADTPEKLRLLAEKLS  
SRPEAVHEYVTPLFVRAPNRKMSGAHKDTLRSKRFRVKNHNEKISVKRVWLTEIKLADLENMV  
NYKNGREIELYELKARLEAYGGNAKQAFDPKDNPFYKKGGLVKAVRVEKTQESGVLLNKK  
NAYTIADNGDMVRVDVFCKVDKKGKNQYFIVPIYAWQVAENILPDIDCKGYRIDDSYTFCSL  
HKYDLIAFQKDEKSKVE
