# Supplementary material for: Phage-assisted evolution of highly active cytosine base editors with enhanced selectivity and minimal sequence context preference
Source: PubMed Central journal article supplement (PMC10894238; doi:10.1038/s41467-024-45969-7), 2024-02-24
Supplement: 41467_2024_45969_MOESM3_ESM.pdf [file 41467_2024_45969_MOESM3_ESM.pdf]

### **Description of Additional Supplementary Files**

Supplementary Data 1. Target protospacers and amplicons used in this study with corresponding primers for genomic amplification.

Supplementary Data 2. Barcodes for Library Analysis
